1  
2  
3  
4  
5  
6  
7  
8  
9  
10  
11  
12  
13  
14  
15  
16  
17  
18  
19  
20  
21  
22  
23  
24  
25  
26  
27  
28  
29

# Ventromedial prefrontal cortex recruitment during memory recall varies non-linearly as a function of remoteness

Daniel N. Barry<sup>1</sup>, Martin J. Chadwick<sup>2</sup> and Eleanor A. Maguire<sup>1\*</sup>

<sup>1</sup>Wellcome Centre for Human Neuroimaging, Institute of Neurology, University College London, 12 Queen Square, London, WC1N 3AR, UK

<sup>2</sup>Institute of Behavioural Neuroscience, Department of Experimental Psychology, Division of Psychology and Language Sciences, University College London, 26 Bedford Way, London, WC1H 0AP, UK

\*Corresponding author: [e.maguire@ucl.ac.uk](mailto:e.maguire@ucl.ac.uk)

Short title: vmPFC and remote memory

Competing interests: The authors declare that no competing interests exist.

30 **Abstract**

31 Systems-level consolidation refers to the time-dependent reorganisation of memory traces in the  
32 neocortex, a process in which the ventromedial prefrontal cortex (vmPFC) has been implicated.  
33 Capturing the precise temporal evolution of this crucial process in humans has long proved elusive.  
34 Here, we used multivariate methods and a longitudinal functional MRI design to detect, with high  
35 granularity, the extent to which autobiographical memories of different ages were represented in  
36 vmPFC and how this changed over time. We observed an unexpected biphasic involvement of vmPFC  
37 during retrieval, rising and falling around an initial peak of 8-12 months, before re-engaging for older  
38 two and five year old memories. This pattern was replicated in two independent sets of memories.  
39 Moreover, it was further replicated in a follow-up study eight months later with the same  
40 participants and memories, where the individual memory representations had undergone their  
41 hypothesised strengthening or weakening over time. We conclude that the temporal engagement of  
42 vmPFC in memory retrieval seems to be non-linear, revealing a complex relationship between  
43 systems-level consolidation and prefrontal cortex recruitment that is unaccounted for by current  
44 theories.

45

46

## 47 **Introduction**

48 We possess a remarkable ability to retrieve, with ease, one single experience from a lifetime of  
49 memories. How these individual autobiographical memories are represented in the brain over time  
50 is a central question of memory neuroscience which remains unanswered.

51 Consolidation takes place on two levels which differ on both a spatial and temporal scale. On  
52 a cellular level, the stabilisation of new memory traces through modification of synaptic connectivity  
53 takes only a few hours (1), and is heavily dependent upon the hippocampus (2-5). On a much longer  
54 timescale, the neocortex integrates new memories, a form of consolidation termed “systems-level”  
55 (6). The precise timeframe of this process is unknown. A related long-standing debate which has  
56 contributed to this uncertainty is whether or not the hippocampus ever relinquishes its role in  
57 autobiographical memory retrieval. One theory asserts that the hippocampus is not involved in the  
58 retrieval of memories after they have become fully consolidated to the neocortex (7). Alternate  
59 views maintain that vivid, detailed autobiographical memories retain a permanent reliance on the  
60 hippocampus for their expression (8-12).

61 An undisputed feature of systems-level consolidation, however, is the strengthening of  
62 neural representations in the neocortex over time. Clarity on the time course of systems-level  
63 consolidation is therefore more likely to be achieved through scrutiny of its neocortical targets.  
64 While theoretical accounts often fail to specify these cortical locations, animal experiments have  
65 consistently implicated the medial prefrontal cortex. While this region has been associated with the  
66 formation (13, 14) and recall of recently acquired memories (15-17), in rodents it appears to be  
67 disproportionately involved in the retrieval of memories learned weeks previously (18-26). The  
68 dependency on this region, which emerges over time, is facilitated by post-learning activation (27)  
69 and structural changes (28-30).

70 The evolutionary expansion of prefrontal cortex in humans makes it challenging to make  
71 direct anatomical comparisons with rodents, but the ventromedial prefrontal cortex (vmPFC) has  
72 been proposed as a homologous site of long-term memory consolidation (31). It may appear

73 surprising that an association between impaired autobiographical memory retrieval and vmPFC  
74 lesions has only recently started to be more precisely characterised (32). However, there are a  
75 number of confounding factors in this field (33) - non-selectivity of vmPFC lesions, methodological  
76 differences in memory elicitation, and the tendency of patients with vmPFC damage to recollect  
77 events which have never occurred, a phenomenon known as confabulation (34).

78 Numerous functional MRI (fMRI) studies of vmPFC activity during autobiographical memory  
79 recall have been conducted, but with inconclusive results. Delay-dependent increases in retrieval-  
80 related activity have been observed in some studies (35, 36) but not others (37-39).  
81 Autobiographical memory in particular induces robust vmPFC engagement (40) but it is unclear  
82 whether this activity increases (41), decreases (42), or remains constant in accordance with memory  
83 remoteness (43-52).

84 A powerful method of fMRI analysis which can help to bridge the empirical gap between the  
85 human and animal literatures is multi-voxel pattern analysis (MVPA), due to its increased sensitivity  
86 to specific neural representations (53). Using this approach, Bonnici et al. (54) demonstrated that  
87 remote 10 year old autobiographical memories were more detectable in the vmPFC than recent two  
88 week old autobiographical memories, consistent with its proposed role as a long-term consolidation  
89 site. This difference was not apparent in other cortical areas, nor did it emerge from a standard  
90 univariate analysis. A follow up study two years later with the same participants and memories,  
91 demonstrated that the original two week old memories were now as detectable in the vmPFC as the  
92 remote memories (55). This suggested the recent memories had been fully consolidated in the  
93 vmPFC after just two years, and perhaps even sooner.

94 The identification of this two year time window represented an opportunity to resolve the  
95 time course of systems-level consolidation with high precision. To do so, we sampled memories from  
96 four month intervals spanning a two year period, and compared their neural representations using  
97 fMRI. Differences in the strength of memory representations across time periods were interpreted  
98 as delay-dependent engagement of the vmPFC. To verify observed time-sensitive differences, we

99 followed the neural evolution of individual memories in a follow up study with the same participants  
100 and memories eight months later. The selection of numerous time-points characterised the  
101 consolidation process with unprecedented temporal resolution, while the longitudinal design was  
102 not only an opportunity to replicate these findings, but to observe systems-level consolidation in  
103 action.

104 Systems-level consolidation is generally assumed to be an incremental process, therefore,  
105 we considered a gradual linear trajectory of vmPFC recruitment as the most likely outcome. The  
106 alternative hypothesis was a rapid strengthening of vmPFC neural representations in the first few  
107 months after an event. The results conformed to neither scenario, and revealed an unexpected  
108 temporal relationship - a transient recruitment of the vmPFC beginning in the months following the  
109 initial experience, followed by an enduring signature of more remote memories. The second,  
110 longitudinal, experiment confirmed this finding. This is the first demonstration, to our knowledge, of  
111 such a temporal dissociation in vmPFC-mediated memory retrieval.

112

## 113 **Results**

### 114 **Experiment 1**

115 One week prior to the fMRI scan, with the assistance of personal photographs, participants (n=30)  
116 verbally recalled and rated the characteristics of autobiographical memories from eight time  
117 periods: memories that were 0.5 months old (0.5M, i.e., two week old memories), 4M, 8M, 12M,  
118 16M, 20M, 24M and also 60M old – these latter memories serving as a definitive benchmark for  
119 remote (5 year old) memories (see Materials and methods, Fig 1A). Two memories from each time  
120 period which were sufficiently vivid, detailed, specific and unique in time and place were chosen for  
121 subsequent recall in the scanner. This meant that there were two full sets of memories. Participants  
122 created a short phrase pertaining to each autobiographical memory, which was paired with the  
123 photograph to facilitate recall during the subsequent fMRI scan.

124

125 ***Comparable subjective recall phenomenology across memories***

126 While all memories satisfied the criteria of being vivid and detailed, and the ratings were high (Fig 1;  
127 see means and SDs in Table S1A), subjective vividness nevertheless varied as a function of memory  
128 age ( $F_{(7,203)} = 3.45$ ,  $p = 0.002$ ), with the most recent, 0.5M old, memories rated higher than 12M ( $t_{29} =$   
129 4.08,  $p = 0.009$ ), 20M ( $t_{29} = 3.88$ ,  $p = 0.016$ ), 24M ( $t_{29} = 4.18$ ,  $p = 0.007$ ) and 60M old memories ( $t_{29} =$   
130 3.45,  $p = 0.049$ , Fig 1B). Subjective ratings of detail also differed across time-points ( $F_{(7,203)} = 5.74$ ,  $p <$   
131 0.001), once again the most recent 0.5M old memories were rated higher than 4M ( $t_{29} = 4.45$ ,  $p =$   
132 0.003), 8M ( $t_{29} = 3.97$ ,  $p = 0.012$ ), 12M ( $t_{29} = 5.00$ ,  $p < 0.001$ ), 16M ( $t_{29} = 4.96$ ,  $p < 0.001$ ), 20M ( $t_{29} =$   
133 5.37,  $p < 0.001$ ), 24M ( $t_{29} = 4.51$ ,  $p = 0.003$ ) and 60M old memories ( $t_{29} = 3.98$ ,  $p = 0.012$ , Fig 1C). The  
134 expenditure of effort during recall also varied according to remoteness of memories ( $F_{(7,203)} = 5.79$ ,  $p$   
135  $< 0.001$ ), with 0.5M old memories being easier to recollect than 12M ( $t_{29} = -5.29$ ,  $p < 0.001$ ), 16M ( $t_{29}$   
136  $= -3.90$ ,  $p = 0.015$ ), 20M ( $t_{29} = -3.67$ ,  $p = 0.027$ ) and 60M old memories ( $t_{29} = -4.55$ ,  $p = 0.003$ , Fig 1D).  
137 No significant difference was observed across time periods from 4M to 60M on any of these  
138 characteristics (all  $p > 0.05$ ), nor did memories differ in their personal significance ( $F_{(7,203)} = 1.66$ ,  $p =$   
139 0.120, Fig 1E) or emotional valence ( $F_{(7,203)} = 1.51$ ,  $p = 0.166$ , Fig 1F) as a function of age.

140 In addition to these main ratings of interest, no difference was reported in the extent to  
141 which memories were recalled as active or static ( $F_{(7,203)} = 1.36$ ,  $p = 0.224$ ), or from a first or third  
142 person perspective ( $F_{(3,69,107.02)} = 1.09$ ,  $p = 0.365$ ) across time periods. The reported frequency at  
143 which memories were recalled since the original event (rated on a five point scale from “never” to  
144 “very frequently”), differed as a function of time ( $F_{(5,11,148.04)} = 4.36$ ,  $p < 0.001$ ), with the most recent  
145 0.5M old memories thought about more frequently than 12M ( $t_{29} = 4.37$ ,  $p = 0.004$ ), 16M ( $t_{29} = 3.47$ ,  
146  $p = 0.046$ ) and 24M ( $t_{29} = 3.71$ ,  $p = 0.024$ ) old memories.

147 Overall, therefore, memories were generally well matched on subjective phenomenological  
148 ratings, satisfied the criteria of high quality of memory recall, with only small differences observed  
149 for the most recent 0.5M old memories compared to the other autobiographical memories, as might  
150 be expected.

151

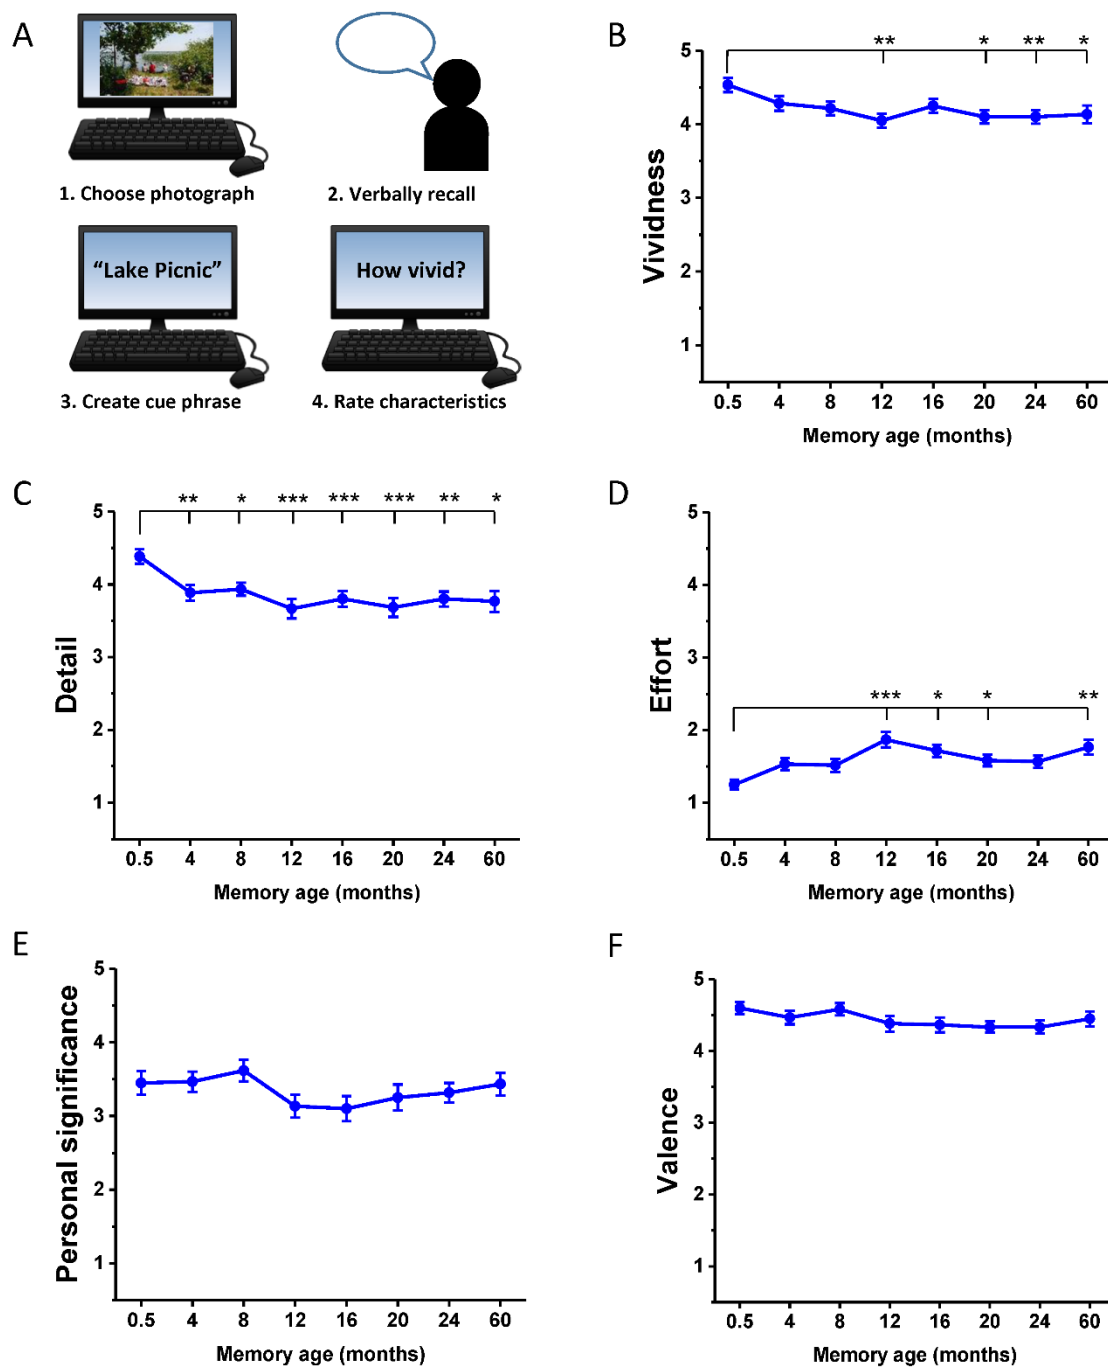

152

153 **Fig 1. Memory harvesting and subjective ratings.** (A) Schematic of the interview where the  
 154 autobiographical memories were harvested. Participants recalled a memory which was cued by a  
 155 personal photograph, chose a phrase to help remind them of this memory during the subsequent  
 156 scanner task, and rated its characteristics. (B-F) Subjective ratings (means +/- 1SEM; see also Table  
 157 S1A) of memory characteristics at each time period for Experiment 1, averaged across the two sets  
 158 of memories. Ratings were on a scale of 1 to 5, where 1 was low and 5 was high. For emotional  
 159 valence: 1-2 = negative, 3 = neutral, 4-5 = positive. \*  $p < 0.05$ , \*\*  $p < 0.01$ , \*\*\*  $p < 0.001$ .

160

161

162 ***Consistent level of details recalled across memories***

163 To complement the subjective ratings of memory characteristics with a more objective assessment  
164 of their content, transcripts of participants' memory interviews were scored using the  
165 Autobiographical Interview protocol [(56); Materials and methods]. In total for this first experiment,  
166 10,187 details were scored. The mean (SD) number of internal details (bound to the specific  
167 'episodic' spatiotemporal context of the event) and external details (arising from a general  
168 'semantic' knowledge or references to unrelated events) are shown in Table S1B (see also Fig 2).  
169 They were then compared across time periods. In contrast to the subjective ratings of memory  
170 detail, there was no difference in the number of details recalled across memories from different  
171 time periods ( $F_{(4.54,131.66)} = 1.92, p = 0.101$ ). As expected, the number of internal and external details  
172 differed ( $F_{(1,29)} = 206.03, p < 0.001$ ), with more internal details recalled for every time period (all  $p <$   
173  $0.001$ ). No interaction between time period and type of detail was observed ( $F_{(7,203)} = 1.87, p =$   
174  $0.077$ ). While a more targeted contrast of the most recent (0.5M) and most remote (60M) memories  
175 did reveal that 0.5M events contained more internal details ( $t(29) = 3.40, p = 0.002$ ), this is  
176 consistent with participants' subjective ratings, and implies that any observed strengthening of  
177 neural representations over time could not be attributable to greater detail at remote time-points.  
178 The number of external details recalled was remarkably consistent across all time periods,  
179 emphasising the episodic nature of recalled events irrespective of remoteness. Inter-rater  
180 reliabilities for the scoring (see Materials and methods) were high for both internal (ICC = 0.94) and  
181 external (ICC = 0.81) details.

182

183

184

185

186

187



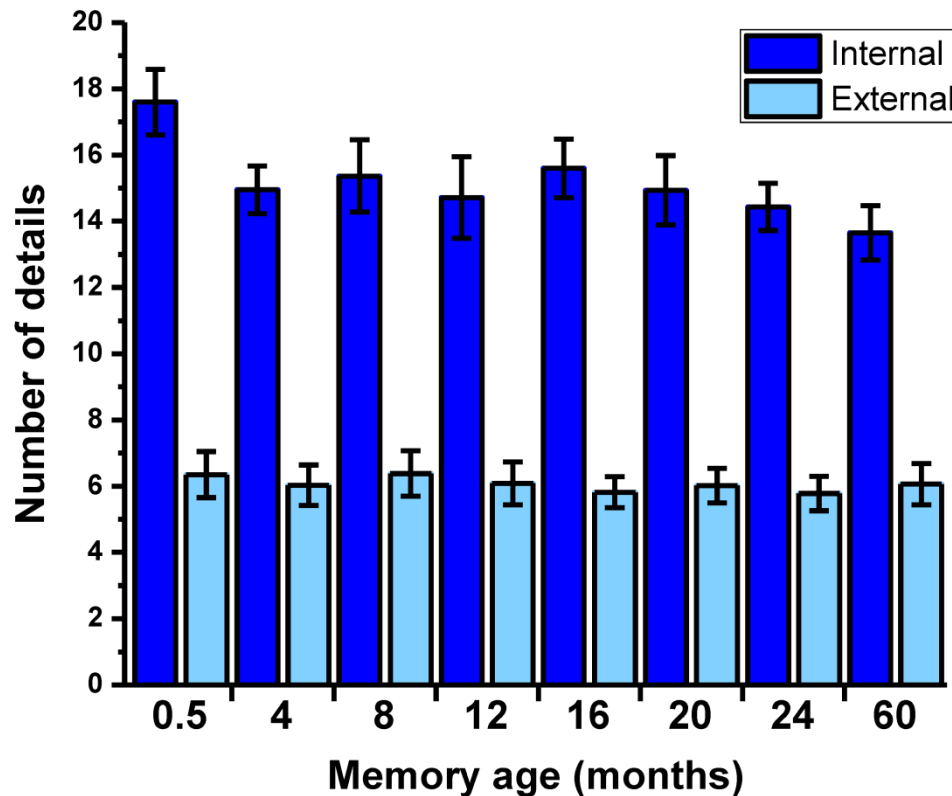

188

189 **Fig 2. Objective scores for memory details.** The mean  $\pm$  1SEM (see also Table S1B) number of  
190 internal and external details at each time period, averaged across the two sets of autobiographical  
191 memories.

192

### 193 *vmPFC engagement during recall is temporally biphasic*

194 vmPFC was delineated as the ventral medial surface of the frontal lobe and the medial portion of the  
195 orbital frontal cortex (57). This comprises areas implicated in memory consolidation (31, 54, 55),  
196 namely Brodmann Areas 14, 25, ventral parts of 24 and 32, the caudal part of 10 and the medial part  
197 of BA 11 (Fig 3A, and Materials and methods).

198 On each trial, the photograph and associated pre-selected cue phrase relating to each event  
199 were displayed on a screen for 3 seconds. Following removal of this cue, participants then closed  
200 their eyes and recalled the memory. After 12 seconds, the black screen flashed white twice, to cue  
201 the participant to open their eyes. The participant was then asked to rate how vivid the memory  
202 recall had been using a five-key button box, on a scale of 1-5, where 1 was not vivid at all, and 5 was  
203 highly vivid (Fig 3B).

204           We used Representational Similarity Analysis (RSA) to quantify the extent to which the  
205 strength of memory representations in the vmPFC differed as a function of memory age. This was  
206 achieved by contrasting the similarity of neural patterns when recalling the same memory with their  
207 similarity to other memories to yield a “neural representation” score for each memory (see  
208 Materials and methods, Fig 3C). As there were two memories recalled per time period, the neural  
209 representation scores were averaged to produce one value for that time period.

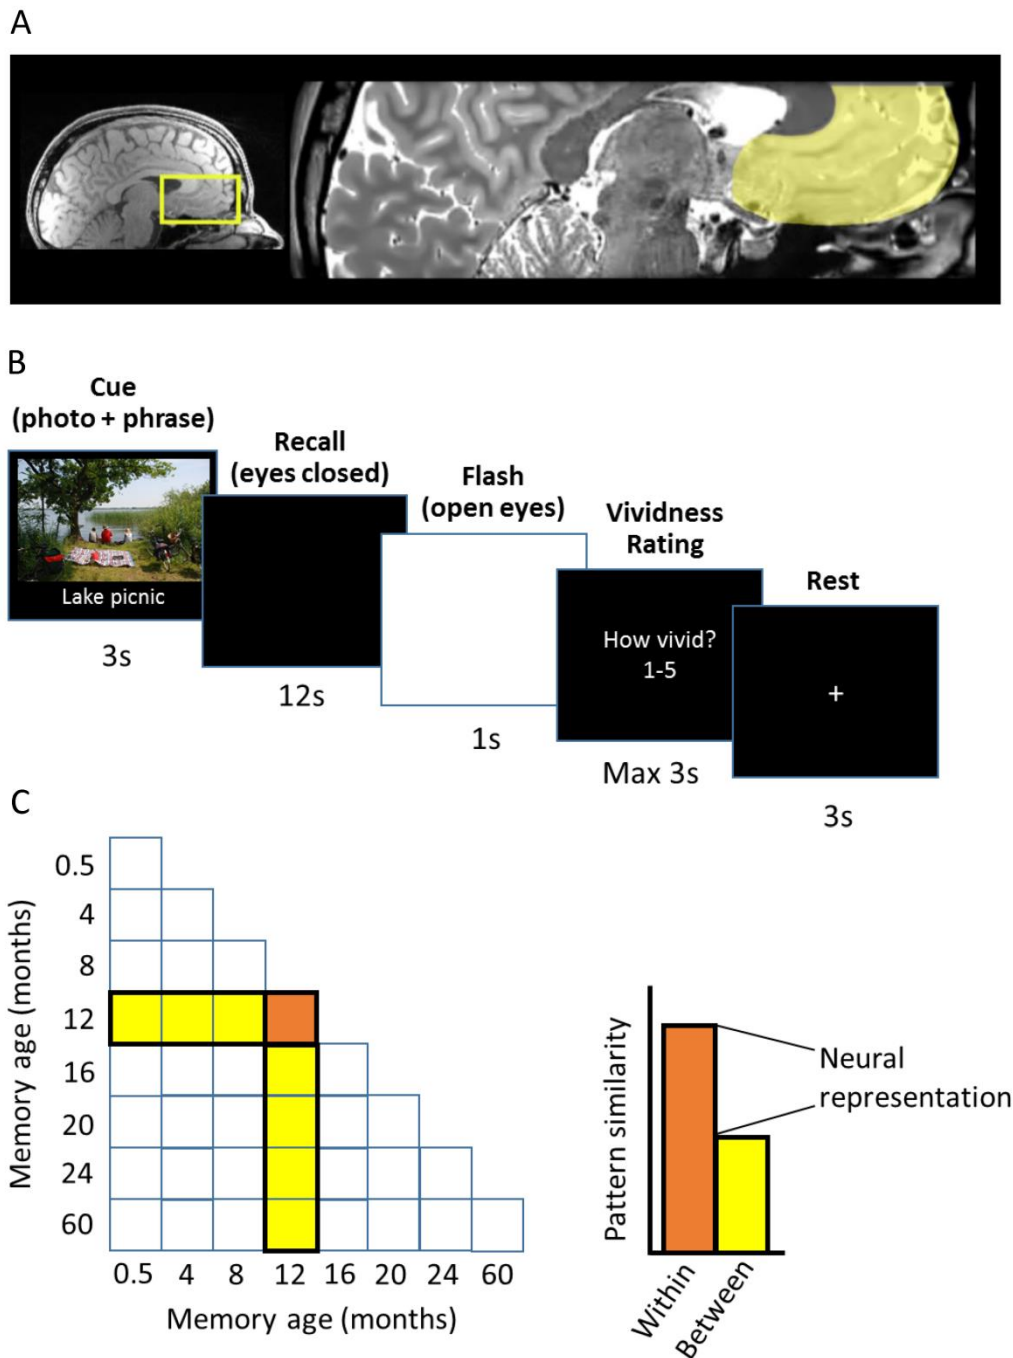

210

211 **Fig 3. Experimental details.** (A) The vmPFC is highlighted on an example participant's structural MRI  
212 scan. (B) The timeline of an example trial from the scanning task. (C) Graphical illustration of the  
213 neural representation score calculation using RSA. The neural pattern similarity across trials recalling  
214 the same memory (orange) minus the mean pattern similarity between that memory and other  
215 memories (yellow) generates a "neural representation" score. A score significantly higher than zero  
216 indicates a neural pattern distinct to that memory is present in the vmPFC.

217

218

219

220 We anticipated an increase in the strength of memory representations at some point  
221 between 0.5M and 24M, in line with the results of Bonnici and Maguire (55). This is what we  
222 observed, where the most recent 0.5M memories were undetectable ( $t_{29} = 0.72$ ,  $p = 0.477$ ) in  
223 vmPFC, in contrast to the distinct neural signatures observed for 4M ( $t_{29} = 2.85$ ,  $p = 0.008$ ), 8M ( $t_{29} =$   
224  $3.09$ ,  $p = 0.004$ ) and 12M ( $t_{29} = 3.66$ ,  $p < 0.001$ ) old memories (Fig 4A). These changes in the strength  
225 of memory representations were significant across time periods ( $F_{(7,203)} = 2.22$ ,  $p = 0.034$ ), with an  
226 observed increase in vmPFC recruitment from 0.5M to 8M ( $t_{29} = 2.07$ ,  $p = 0.048$ ) and 12M ( $t_{29} =$   
227  $2.20$ ,  $p = 0.036$ ).

228 However, what was observed for the following two time periods was unexpected – an  
229 apparent disengagement of the vmPFC over the next eight months as we observed weak  
230 detectability of memory representations in vmPFC for 16M ( $t_{29} = 1.85$ ,  $p = 0.074$ ) and 20M ( $t_{29} =$   
231  $1.03$ ,  $p = 0.310$ ) old memories. Neither 16M ( $t_{29} = -1.06$ ,  $p = 0.298$ ) nor 20M memories ( $t_{29} = -0.40$ ,  $p$   
232  $= 0.691$ ) were more strongly represented than the recent 0.5M old memories. In contrast, the more  
233 remote 24M ( $t_{29} = 4.34$ ,  $p < 0.001$ ) and 60M ( $t_{29} = 3.55$ ,  $p = 0.001$ ) memories were detectable in the  
234 vmPFC, and significantly more so than the most recent memories (24M vs 0.5M,  $t_{29} = -2.93$ ,  $p =$   
235  $0.007$ ; 60M vs 0.5M,  $t_{29} = -2.54$ ,  $p = 0.017$ ) as well as the more temporally proximal 20M old  
236 memories (24M vs 20M,  $t_{29} = -2.50$ ,  $p = 0.018$ ; 60M vs 20M,  $t_{29} = -2.32$ ,  $p = 0.028$ ).

237 The experimental design afforded us the opportunity to verify this biphasic pattern. As we  
238 sampled two memories per time-point, this time-dependent pattern should be evident in both sets  
239 of memories. As shown in Fig 4B, the two sets of memories followed a similar time-course of  
240 changes in representation within vmPFC. This is a compelling replication, given that the two  
241 memories from each time-period were unrelated in content as a prerequisite for selection, recalled  
242 in separate sessions in the scanner and analysed independently from each other.

243

244

245

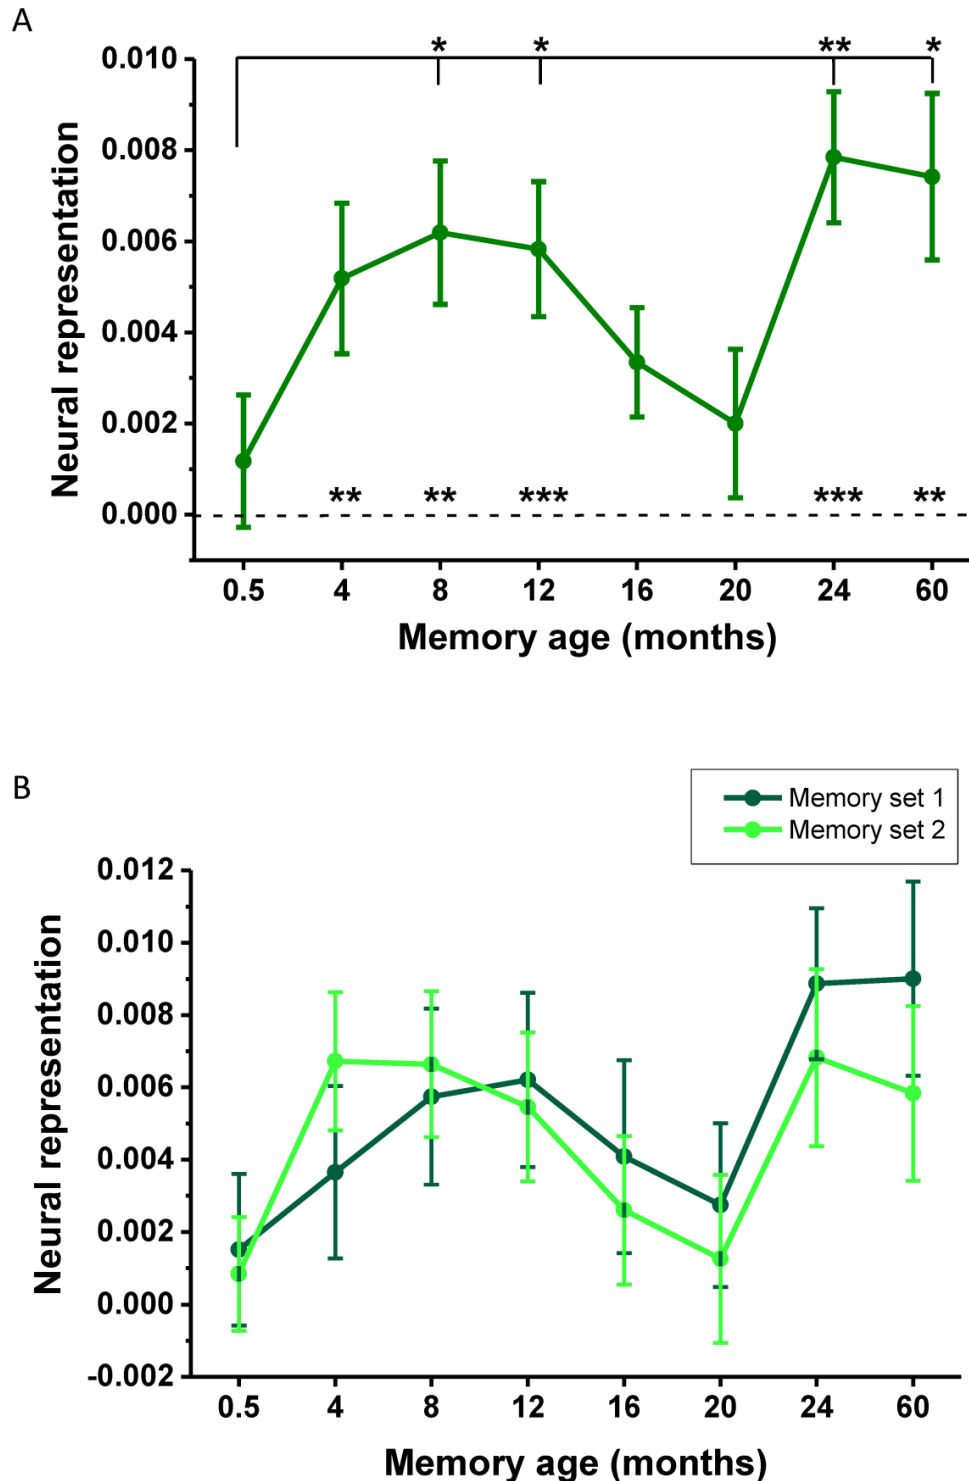

246  
247

248 **Fig 4. fMRI results of Experiment 1.** (A) Mean +/- 1SEM neural representation scores at each time-  
249 point averaged across the two sets of memories. Asterisks above the dotted line indicate  
250 detectability of memories in vmPFC at each time-point. Asterisks above the solid line indicate  
251 significant increases in memory representations compared to the most recent (0.5M old) memories.  
252 \*  $p < 0.05$ , \*\*  $p < 0.01$ , \*\*\*  $p < 0.001$ . See Fig S1 for the underlying representational similarity matrix  
253 and Fig S2 for a boxplot distribution of these data. (B) Neural representation scores at each time-  
254 point plotted separately for the two sets of autobiographical memories.

255

256           The availability of two memories at each time-point also permitted the use of an alternative  
257 approach to calculating neural representation scores. Instead of using the similarity to memories  
258 from other time-points as a baseline, we could also assess if memories were similar to their  
259 temporally matched counterpart in the other set. As can be seen in Fig S3, the biphasic pattern is  
260 preserved even when just using one identically aged memory as a baseline. In other words, the  
261 distinguishable patterns are specific to each individual memory rather than attributable to general  
262 retrieval processes associated with any memory of the same age.

263

#### 264 ***The observed temporal relationship is unique to vmPFC***

265 Our main focus was the vmPFC, given previous work highlighting specifically this region's role in  
266 representing autobiographical memories over time (54, 55). We also scanned within a partial volume  
267 (to attain high spatial resolution with a reasonable TR), so were constrained in what other brain  
268 areas were available for testing (see Materials and methods). Nevertheless, we examined the same  
269 brain areas as Bonnici et al. (54), Bonnici and Maguire (55), and in no case did we observe a  
270 significant change in memory detectability across time periods - entorhinal/perirhinal cortex ( $F_{(7,203)}$   
271 = 1.55,  $p = 0.154$ ), hippocampus ( $F_{(7,203)} = 0.98$ ,  $p = 0.445$ ), posterior parahippocampal cortex ( $F_{(7,203)} =$   
272 1.41  $p = 0.202$ ), retrosplenial cortex ( $F_{(7,203)} = 0.74$ ,  $p = 0.641$ ), temporal pole ( $F_{(7,203)} = 1.78$ ,  $p = 0.093$ )  
273 or lateral temporal cortex ( $F_{(4,86,141.03)} = 0.68$ ,  $p = 0.636$ ). Of note, memories which were  
274 undetectable in the vmPFC were still represented in other regions at these time points (Table S2).

275           Following scanning, participants completed three additional ratings. They were asked to  
276 indicate the extent to which the memories were changed by the 6 repetitions during scanning on a  
277 scale ranging from 1 (not at all) to 5 (completely). They reported that the memories were not  
278 changed very much by repetition (mean: 2.61, SD: 0.74). They were also asked how often during  
279 scanning they thought about the memory interview one week previous on a scale of 1 (not at all) to  
280 5 (completely), with participants indicating they rarely thought about the interview (mean: 2.29, SD:  
281 1.01). Finally, participants were asked the extent to which the recall of memories from each time

282 period unfolded in a consistent manner over the course of the session. A difference was observed  
283 ( $F_{(7,203)} = 2.78, p = 0.009$ ), with the most recent 0.5M old memories being rated as more consistently  
284 recalled than the most remote 60M memories ( $t_{29} = 3.97, p = 0.012$ ).

285 In addition to the ROI-based approach, a searchlight analysis was also conducted in MNI  
286 group normalised space to localise areas within the vmPFC where memories displayed high  
287 detectability across participants (see Materials and methods). We discovered a significant bilateral  
288 cluster of 652 voxels (Fig S4A), and subsequently used RSA to quantify the strength of neural  
289 representations at each time-point within this area (Fig S4B). The results were highly similar to the  
290 whole-ROI analysis in native space, suggesting the main result may be driven by more spatially  
291 confined activity within the vmPFC. However a searchlight approach is sub-optimal to answer the  
292 current research question, as it requires an *a priori* model RSM against which to compare the neural  
293 patterns at each searchlight sphere, whereas the ROI approach makes no such assumptions.

294 We also conducted a standard mass-univariate analysis on the whole volume with memory  
295 remoteness as a parametric regressor, and this did not reveal any significant results, consistent with  
296 the findings of Bonnici et al. (54). In a similar parametric analysis, we did not find evidence of the  
297 modulation of univariate activity by in-scanner vividness ratings as might be suggested by the  
298 findings of Sheldon and Levine (59), however, all memories chosen for the current study were highly  
299 vivid in nature.

300

## 301 **Rationale and predictions for Experiment 2**

302 The biphasic pattern we observed in the fMRI data did not manifest itself in the subjective or  
303 objective behavioural data. In fact, the only difference in those data was higher ratings for the most  
304 recent 0.5M old memories. However, these were paradoxically the most weakly represented  
305 memories in the vmPFC, meaning the neural patterns were not driven by memory quality. The  
306 objective scoring of the memories confirmed comparable levels of detail provided for all memories,  
307 without any significant drop in episodic detail or increase in the amount of semantic information

308 provided as a function of time. Therefore, the amount or nature of the memory details were not  
309 contributing factors.

310 Nevertheless, to verify that the results genuinely represented the neural correlates of  
311 memory purely as a function of age, one would need to study the effects of the passage of time on  
312 the individual neural representations. Therefore we invited the participants to revisit eight months  
313 later to recall the same memories again both overtly and during scanning; 16 of the participants  
314 agreed to return. In order to generate specific predictions for the neural representations during  
315 Experiment 2, we took the actual data for the 16 subjects from Experiment 1 who returned eight  
316 months later (Fig 5 green line, where the biphasic pattern is still clearly evident), and shifted it  
317 forwards by two time-points to simulate the expected pattern eight months later (Fig 5 dark grey  
318 line). Note that for the 28M and 32M time periods in Experiment 2 we assumed they would have the  
319 same level of detectability as 24M old memories given the absence of data relating to these time  
320 periods from Experiment 1. We further assumed the neural representations between 60M and 68M  
321 would be unchanged.

322 A significant difference between original and predicted neural representation scores from  
323 any time period would generate a hypothesised change. Accordingly, 0.5M old memories were  
324 hypothesised to be more detectable eight months later ( $t_{15} = -2.85$ ,  $p = 0.012$ ), while the original 4M  
325 ( $t_{15} = -0.40$ ,  $p = 0.695$ ) and 8M ( $t_{15} = 0.80$ ,  $p = 0.436$ ) old memories should remain unchanged. Twelve  
326 month old memories from Experiment 1 should decrease in detectability ( $t_{15} = 2.61$ ,  $p = 0.020$ ),  
327 whereas 16M old memories should not differ significantly in their representations at 24M ( $t_{15} = -$   
328  $1.53$ ,  $p = 0.146$ ). Original 20M old memories should be better represented at 28M ( $t_{15} = -4.15$ ,  $p <$   
329  $0.001$ ). Finally, the original 24 and 60 month memories were not assumed to change over time in the  
330 strength of neural representations. Overall, therefore, while an increase in detectability in vmPFC of  
331 the 0.5M memories eight months later is an obvious prediction, the unexpected predictions  
332 generated by the Experiment 1 data were a decrease in detectability of the previously well-



333 represented 12M old memories and an increase in the detectability of the previously undetectable  
334 20M old memories, with no concomitant changes in the behavioural data.  
335

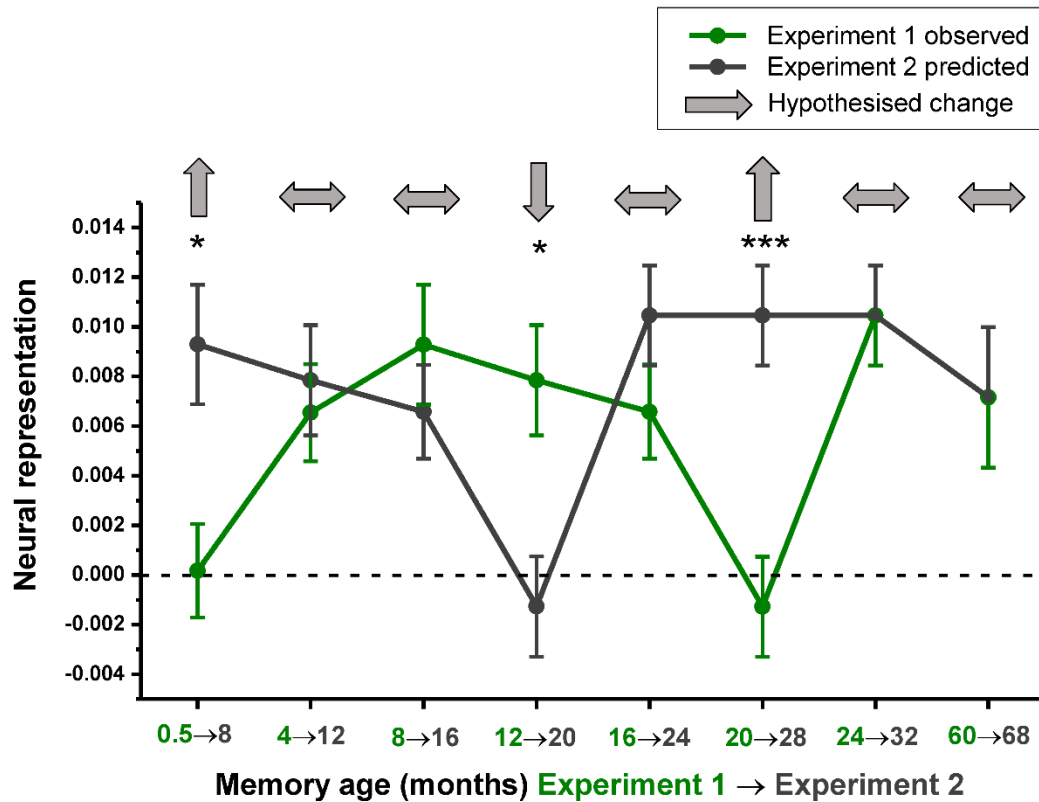

336  
337

338 **Fig 5. Predicted fMRI changes eight months later in Experiment 2.** Predicted mean +/- 1SEM  
339 changes in the neural representations of individual autobiographical memories after eight months  
340 (dark grey line), based on shifting the original observed data forward by two time-points for the 16  
341 participants from Experiment 1 (green line) who returned for Experiment 2. Light grey arrows  
342 indicate the hypotheses. \*  $p < 0.05$ , \*\*  $p < 0.01$ .

343

#### 344 **Experiment 2 (eight months later)**

345 One week prior to the fMRI scan, with the assistance of the personal photographs and previously  
346 chosen phrases which were used as cues in Experiment 1, the participants verbally recalled and  
347 rated the characteristics of their autobiographical memories just as they had done eight months  
348 previously (see Materials and methods and Fig 6A).

349

350

351 ***Subjective ratings of phenomenology remain equivalent across memories***

352 Means and SDs are provided in Table S3A. Autobiographical memories recalled during Experiment 2  
353 did not differ across time periods on vividness ( $F_{(7,105)} = 0.83$ ,  $p = 0.564$ ), detail ( $F_{(7,105)} = 1.30$ ,  $p =$   
354  $0.257$ ), effort ( $F_{(7,105)} = 0.11$ ,  $p = 0.998$ ), personal significance ( $F_{(7,105)} = 1.49$ ,  $p = 0.180$ ), valence ( $F_{(7,105)}$   
355  $= 1.06$ ,  $p = 0.397$ ), viewpoint ( $F_{(3,42,51,22)} = 1.24$ ,  $p = 0.31$ ) or motion ( $F_{(3,95,59,32)} = 1.43$ ,  $p = 0.237$ ).  
356 When asked how frequently they had thought about the autobiographical memories in the eight  
357 months between experiments (rated on a five point scale from “never” to “very frequently”),  
358 participants reported some change across time periods ( $F_{(7,105)} = 3.04$ ,  $p = 0.006$ ). However, the only  
359 significant difference between time periods was a lower recall frequency for now 32M old memories  
360 compared to the now 12M ( $t_{15} = 3.87$ ,  $p = 0.042$ ). Given the range of responses to this question  
361 across conditions (1.50-2.03), clearly participants had not given the memories much thought in the  
362 intervening eight months. Therefore, all memories recalled in Experiment 2 were extremely well  
363 matched in terms of their phenomenology, which reflects the consistency observed in ratings from  
364 eight months onwards in Experiment 1.

365 There were, however, differences in the absolute values of subjective ratings between the  
366 two experiments. There was a decrease in the reported vividness of all memories from Experiment 1  
367 to Experiment 2 ( $F_{(1,15)} = 88.45$ ,  $p < 0.001$ ), from 0.5M to when they were 8M old ( $t_{15} = 6.21$ ,  $p <$   
368  $0.001$ ), 8M to 16M ( $t_{15} = 4.21$ ,  $p = 0.006$ ), 12M to 20M ( $t_{15} = 5.48$ ,  $p < 0.001$ ), 16M to 24M ( $t_{15} = 7.07$ ,  
369  $p < 0.001$ ), 20M to 28M ( $t_{15} = 4.10$ ,  $p = 0.008$ ), 24M to 32M ( $t_{15} = 5.97$ ,  $p < 0.001$ ) and 60M to 68M  
370 ( $t_{15} = 5.33$ ,  $p < 0.001$ ; Fig 6B). A comparable change was observed in the subjective impression of  
371 memory detail recalled following the eight month interlude ( $F_{(1,15)} = 126.81$ ,  $p < 0.001$ ), with a drop  
372 from 0.5M to 8M ( $t_{15} = 6.26$ ,  $p < 0.001$ ), 8M to 16M ( $t_{15} = 4.03$ ,  $p = 0.009$ ), 12M to 20M ( $t_{15} = 4.78$ ,  $p$   
373  $= 0.002$ ), 16M to 24M ( $t_{15} = 3.72$ ,  $p = 0.016$ ), 20M to 28M ( $t_{15} = 3.67$ ,  $p = 0.018$ ), 24M to 32M ( $t_{15} =$   
374  $4.55$ ,  $p < 0.003$ ) and 60M to 68M ( $t_{15} = 9.67$ ,  $p < 0.001$ ; Fig 6C). Recalling memories eight months  
375 later was also perceived as more effortful ( $F_{(1,15)} = 43.32$ ,  $p < 0.001$ ), from 0.5M to 8M ( $t_{15} = -7.81$ ,  $p <$   
376  $0.001$ ), 4M to 12M ( $t_{15} = -3.30$ ,  $p = 0.039$ ), 16M to 24M ( $t_{15} = -1.95$ ,  $p = 0.021$ ), and 20M to 28M ( $t_{15} =$

377 -4.03,  $p = 0.009$ ; Fig 6D). The elapsed time between experiments also led to a reduction in the  
378 reported personal significance of memories ( $F_{(1,15)} = 11.82$ ,  $p = 0.004$ ), from 24M to 32M ( $t_{15} = 3.58$ ,  $p$   
379  $= 0.022$ ; Fig 6E). Ratings of emotional valence also changed over the eight month period ( $F_{(1,15)} =$   
380  $9.78$ ,  $p = 0.007$ ), with a reported attenuation of the positivity of memories from 12M to 20M ( $t_{15} =$   
381  $3.87$ ,  $p = 0.012$ ; Fig 6F). In addition to these main ratings, no difference was reported in the extent to  
382 which memories were recalled from a first or third person perspective ( $F_{(1,15)} = 0.513$ ,  $p = 0.485$ ) over  
383 the eight month period. The extent to which memories were recalled as active or static was altered  
384 by the passage of time between experiments ( $F_{(1,15)} = 11.01$ ,  $p = 0.005$ ), with the original 0.5M old  
385 memories becoming more static when 8M old ( $t_{15} = -3.42$ ,  $p = 0.031$ ).

386         Despite the observed changes in some subjective ratings from Experiment 1 to Experiment  
387 2, they were unidirectional across all time periods. As such, if the pattern of hypothesised  
388 emergence and disappearance of neural representations in vmPFC were to be supported in  
389 Experiment 2, then it could not be accounted for by changes in subjective ratings. Additionally,  
390 although the changes in subjective ratings across time tend to suggest a comparable degradation in  
391 memory quality across all time periods, this may be misleading. The ratings overall were still high,  
392 and these absolute changes in values could be influenced by participants' expectations of their  
393 ability to recall memories after an extended period of time with high fidelity, because the objective  
394 scoring of memory detail revealed no such pattern, as we report in the next section.

395

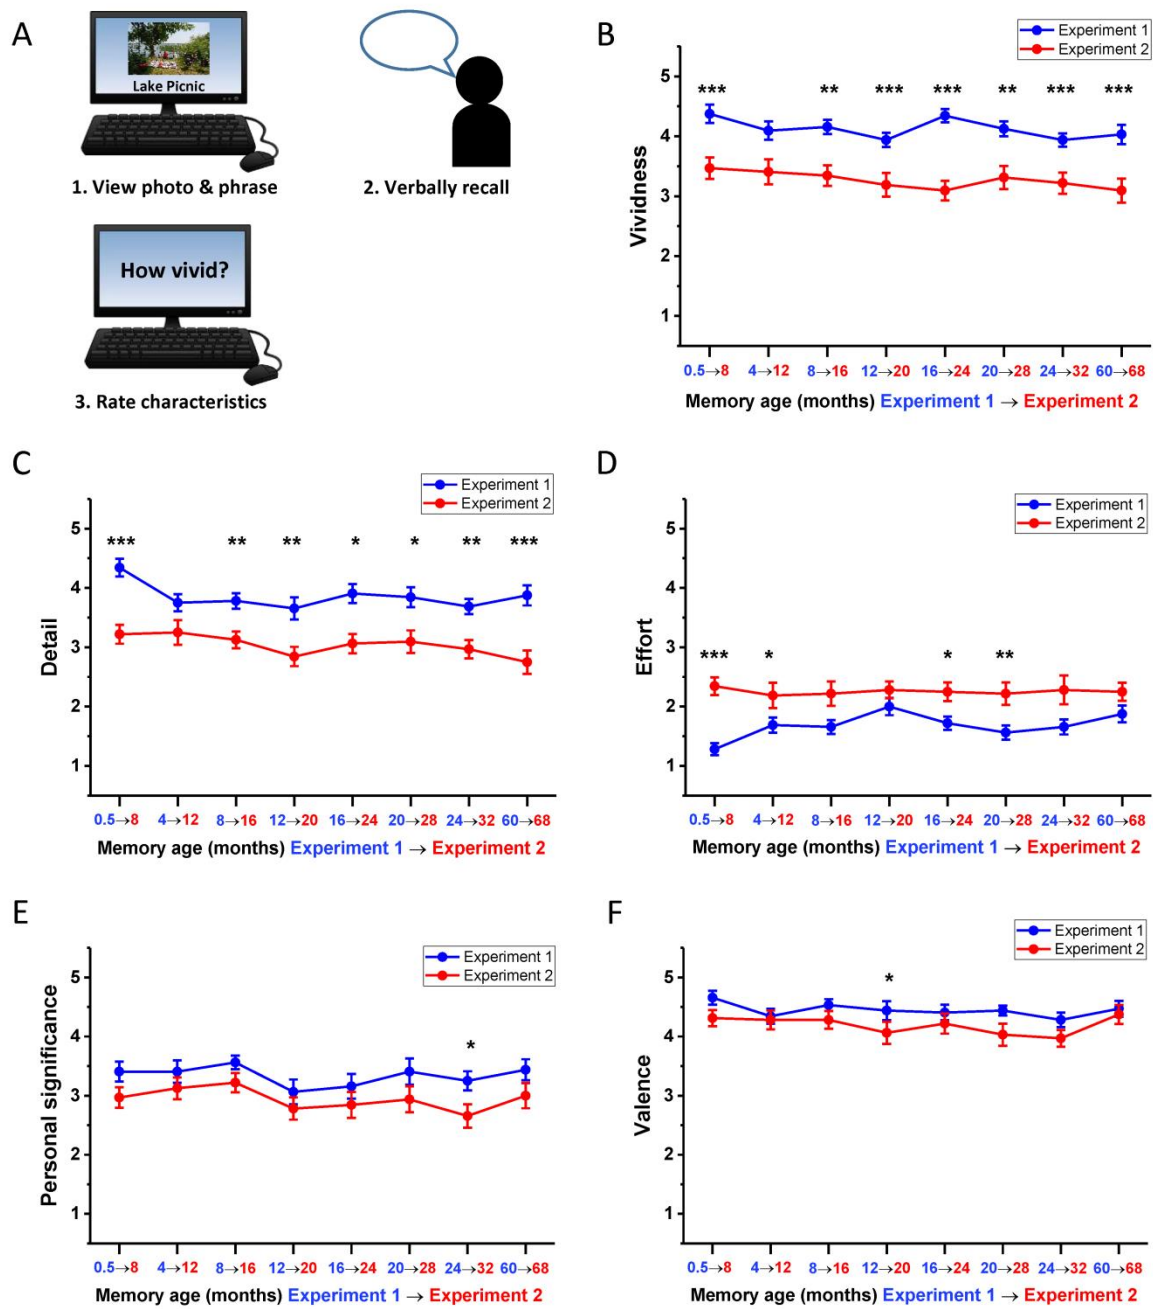

396

397 **Fig 6. Memory recall and subjective ratings.** (A) Schematic of the interview where participants  
 398 recalled an autobiographical memory using their previously chosen photograph and cue phrase and  
 399 rated its characteristics. (B-F) Subjective ratings (means  $\pm$  1SEM; see also Tables S1A, S3A) of  
 400 memory characteristics at each time period for Experiment 1 (blue line,  $n=16$  participants) and how  
 401 the ratings of the same memories differed eight months later during Experiment 2 (red line, the  
 402 same  $n=16$  participants) averaged across the two sets of memories in both cases. Ratings were on a  
 403 scale of 1 to 5, where 1 was low and 5 was high. For emotional valence: 1-2 = negative, 3 = neutral,  
 404 4-5 = positive. Asterisks indicate significant differences in memory ratings between Experiments 1  
 405 and 2; \*  $p < 0.05$ , \*\*  $p < 0.01$ , \*\*\*  $p < 0.001$ .

406

407

408 ***A similar level of detail was recalled across experiments***

409 As with Experiment 1, transcripts of participants' memory interviews during Experiment 2 were  
410 scored using the Autobiographical Interview protocol [(56); see Materials and methods]). A total of  
411 6,444 details were scored (see Table S3B for means, SD). There was a difference in the number of  
412 details recalled across different time periods in Experiment 2 ( $F_{(7,105)} = 2.49$ ,  $p = 0.021$ ). However,  
413 this difference was only observed for external details ( $F_{(7,105)} = 3.25$ ,  $p = 0.004$ ), with more provided  
414 for 28M memories than 12M memories ( $t_{15} = -4.68$ ,  $p = 0.008$ ). As with Experiment 1, the number of  
415 internal and external details differed ( $F_{(1,15)} = 72.57$ ,  $p < 0.001$ ), with more internal details recalled for  
416 every time period (all  $p < 0.01$ ). No interaction between time period and type of detail was observed  
417 ( $F_{(7,105)} = 0.87$ ,  $p = 0.530$ ).

418 When the objective scores for both experiments were compared, no significant difference  
419 was observed in the overall number of details provided eight months later ( $F_{(1,15)} = 1.93$ ,  $p = 0.185$ ;  
420 Fig 7). Furthermore, there was no significant interaction between experiment and time period ( $F_{(1,15)}$   
421  $= 1.97$ ,  $p = 0.066$ ), indicating that the amount of details provided for memories from any particular  
422 time period in Experiment 1 were not affected by the passage of time. Finally, no interaction was  
423 observed between experiment and type of detail provided ( $F_{(1,15)} = 2.27$ ,  $p = 0.153$ ), showing that the  
424 ratio of internal to external details was preserved across experiments.

425

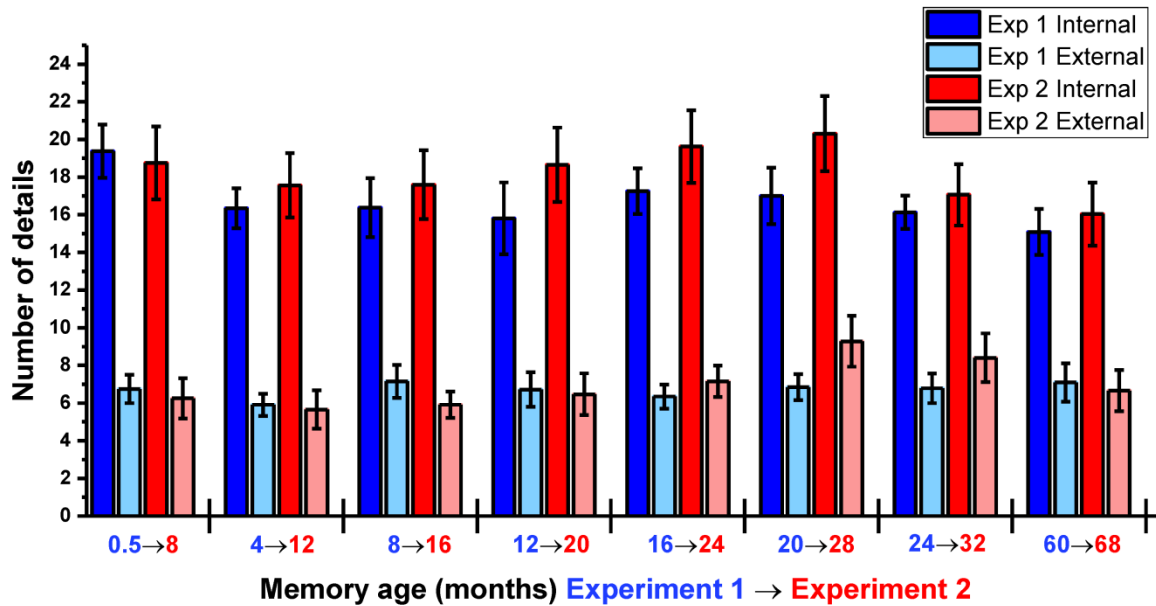

426  
427

428 **Fig 7. Objective scores for memory details over time.** The mean +/- 1SEM (see also Tables S1B, S3B)  
429 number of internal and external details at each time period for Experiment 1 (blue bars, n=16  
430 participants) and Experiment 2 (red bars, the same n=16 participants), averaged across the two sets  
431 of autobiographical memories.

432

433

434 ***vmPFC memory representations undergo the predicted time-dependent changes***

435 Participants were scanned in an identical fashion as Experiment 1 (see Materials and methods and  
436 Fig 3B), and neural representation scores for memories from each time point were again calculated.

437 When comparing the neural representation scores of memories from the eight original time  
438 periods in Experiment 1 with those of the same memories eight months later during Experiment 2, a  
439 main effect for experiment ( $F_{(1,15)} = 2.35, p = 0.146$ ), or time period ( $F_{(7,105)} = 1.18, p = 0.323$ ), was not  
440 observed, however, an interaction between experiment and time period emerged ( $F_{(7,105)} = 3.46, p =$   
441  $0.002$ ). Closer examination via our planned comparisons (see Fig 5 for a reminder of our predictions)  
442 revealed that seven out of the eight predictions made on the basis of the Experiment 1 findings were  
443 supported (Fig 8A). The original 0.5M old memories had increased in their representational strength  
444 in vmPFC eight months later ( $t_{15} = -1.84, p = 0.043$ ), while the neural representation scores of the 4M  
445 and 8M old memories were essentially unchanged at 12M ( $t_{15} = 0.43, p = 0.677$ ) and 16M ( $t_{15} = 1.22,$   
446  $p = 0.242$ ) respectively. As expected, the original 12M old memories from Experiment 1 were eight

447 months later more poorly represented in vmPFC when 20M months old ( $t_{15} = 1.85$ ,  $p = 0.042$ ). The  
448 original 16M old memories were unchanged in their representational strength at 24M ( $t_{15} = 1.38$ ,  $p =$   
449  $0.187$ ), while 20M old memories were significantly more detectable in vmPFC at 28M ( $t_{15} = -2.69$ ,  $p =$   
450  $0.008$ ). The most remote 60M memories did not differ in their neural representation scores eight  
451 months later ( $t_{15} = 0.86$ ,  $p = 0.402$ ). In fact the only finding which was inconsistent with the  
452 predictions generated by Experiment 1 was a decrease in the representation of 24M old memories  
453 when they were 32M of age ( $t_{15} = -2.69$ ,  $p = 0.009$ ). However, this prediction was based on the  
454 assumption that memories do not undergo further dynamic shifts in neural representation between  
455 two and five years, which may not be the case, and we did not have 32M data from Experiment 1 to  
456 corroborate this finding.

457 For completeness, Fig 8B plots the neural representation scores for the two sets of  
458 memories in Experiment 2. As previously observed in Experiment 1, the two sets of memories  
459 displayed a similar time-course in terms of their neural representations, despite being recalled in  
460 separate scanning sessions, in a randomised order and analysed separately. As with Experiment 1,  
461 when examining other brain areas within the partial volume in Experiment 2, in no case did we find a  
462 significant difference in memory detectability across time periods.

463 Following scanning in Experiment 2, participants completed three additional ratings. They  
464 were asked to indicate the extent to which the memories were changed by the 6 repetitions during  
465 scanning on a scale ranging from 1 (not at all) to 5 (completely). As in Experiment 1, they reported  
466 that the memories were not changed very much by repetition (mean: 2.56, SD: 0.81). They were also  
467 asked how often they thought of the experience of recalling the memories in Experiment 1 while  
468 performing the scanning task in Experiment 2 on a scale of 1 (not at all) to 5 (during every memory).  
469 Participants indicated they rarely thought about Experiment 1 (mean: 1.75, SD: 0.93). Finally, the  
470 consistency of recall across time periods during the scanning session did not differ in Experiment 2  
471 ( $F_{(7,105)} = 0.59$ ,  $p = 0.761$ ) or between the two experiments ( $F_{(1,15)} = 0.12$ ,  $p = 0.733$ ; see also Tables  
472 S1A and S3A).

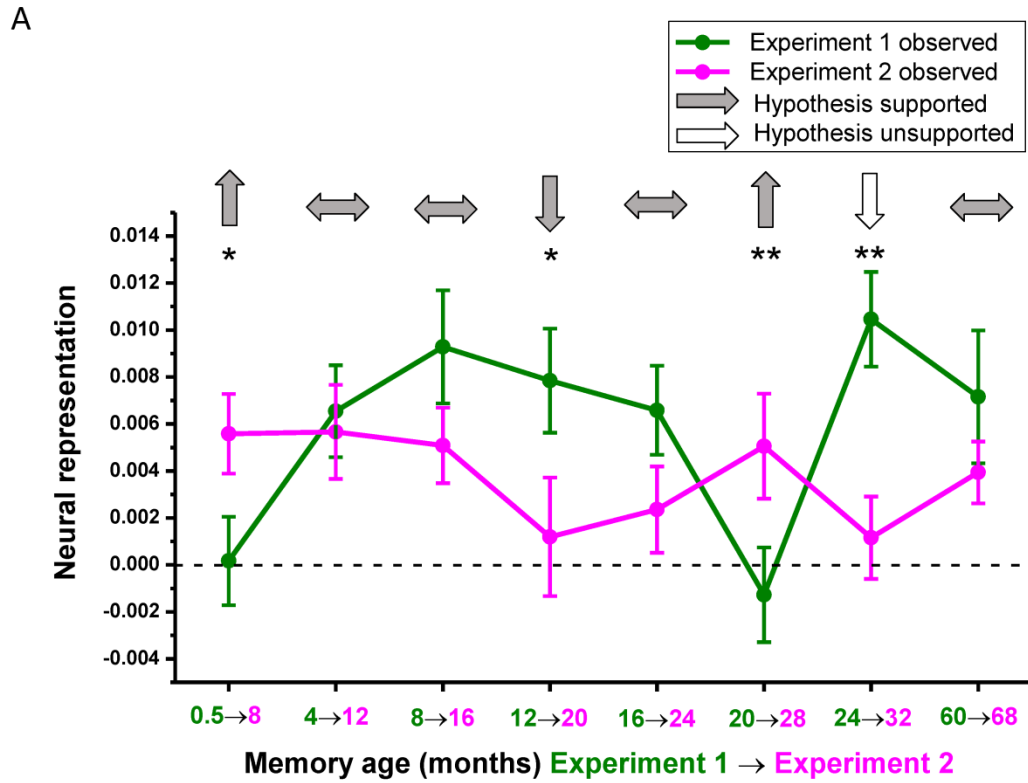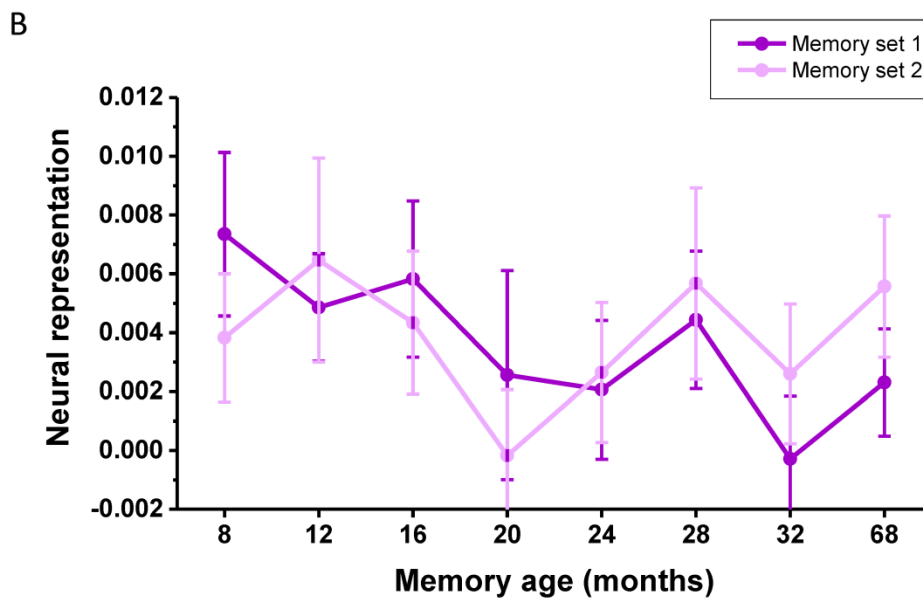

473  
 474 **Fig 8. fMRI results of Experiment 2.** (A) Mean +/- 1SEM neural representation scores at each time-  
 475 point averaged across the two sets of memories for Experiment 2 (pink line, n=16 participants)  
 476 compared to the same memories from eight months previously (green line, the same n=16  
 477 participants). Light grey and white arrows indicate supported and unsupported hypotheses  
 478 respectively; \*  $p < 0.05$ , \*\*  $p < 0.01$ . (B) Neural representation scores at each time-point for  
 479 Experiment 2, plotted separately for the two sets of autobiographical memories.

480



## 481 **Discussion**

482 This study exploited the sensitivity of RSA to detect not only the extent to which memories of  
483 different ages were represented in the vmPFC, but how these representations changed over time.  
484 During Experiment 1, we observed detectability in vmPFC for memories at 4M to 12M of age, which  
485 was also evident at 24M and 60M. As expected, recent 0.5M old memories were poorly represented  
486 in vmPFC in comparison. Curiously, however, the same lack of detectability in vmPFC was observed  
487 for memories that were 16M to 20M old. This pattern persisted across separate sets of memories  
488 and was replicated in a follow-up study eight months later with the same participants and  
489 memories. Behavioural data failed to account for these time-dependent representational changes in  
490 either experiment, and other regions failed to show a significant change in memory representations  
491 over time. These findings are difficult to accommodate within existing theoretical frameworks of  
492 long-term memory consolidation (9, 12, 60-62), as neocortical recruitment is generally assumed to  
493 involve an ascending linear trajectory. Consolidation has been characterised as fluid and continuous  
494 (63), but the biphasic vmPFC engagement observed here suggests additional complexity in its  
495 temporal recruitment.

496

### 497 **Processing of consolidated memories in the vmPFC**

498 The observed weak representation of recent memories is consistent with the time-dependent  
499 nature of systems-level consolidation. Likewise, the progressive increase in vmPFC memory  
500 detectability from 4 to 12 months is indicative of memories being consolidated with the passage of  
501 time. However the subsequent weakening of memory representations from 12 to 20 months, and a  
502 re-engagement for more remote memories, suggests the vmPFC performs separate operations on  
503 consolidated representations, one medium and one longer-term.

504         The initial period of detectability (4-12M) represents a congested memory space (64)  
505 compared to remote life periods. Therefore interference from related memories may be an issue.  
506 The vmPFC is involved in the inhibition of irrelevant memories (65, 66), which may be the medium-

507 term cognitive process underlying the first phase of recruitment. Remote memories (>24M) are  
508 potentially less affected by interference, but may require more cognitive flexibility to retrieve due to  
509 sharing fewer features with the current spatiotemporal context. Such facilitation by the vmPFC may  
510 arise from the deployment of schema by this region (67) which refers to the abstraction of elements  
511 common to multiple experiences. Such schema could be used to rapidly and preconsciously confine  
512 memory search to a subset of temporally distant representations. This would likely become a  
513 necessary long-term strategy for all remote memories. Memories of an interim age may simply not  
514 rely as much on the vmPFC for successful retrieval due to minimal interference from related  
515 memories which have decayed, and sufficient temporal proximity to render schema-mediated  
516 retrieval unnecessary.

517         It is worth noting, however, that the observed neural patterns are unlikely to reflect time-  
518 sensitive general processes which are independent of memory content. If that were the case, the  
519 two sets of memories would be indistinguishable from each other at every time period. However,  
520 neural patterns for individual memories were as distinct from their temporally matched  
521 counterparts as memories of different ages. The neural activation is therefore memory-specific,  
522 suggestive of a locally-stored representation at the very least, and more likely an additional  
523 associated executive process. The strengthening of neural connections over time may therefore be  
524 linear, but the extent to which the vmPFC utilises these representations during retrieval is not, and  
525 remains highly sensitive to memory age. Fully appreciating the role of the vmPFC in memory  
526 retrieval may involve a combination of both storage and processing in this region, and how they  
527 interact (68).

528         Using an autobiographical memory paradigm to study consolidation is preferable to  
529 laboratory-based episodic memory tests by virtue of its ecological validity, availability of temporally  
530 distant stimuli, clinical significance and context-dependent equivalence to animal tasks. However,  
531 studying autobiographical memory carries with it potential confounds which can affect  
532 interpretation of results. Below we consider why these factors cannot account for our observations.

533

534 **Consistency of recall and forgetting**

535 Older memories may yield a higher RSA score if they are more consistently recalled. Here, however,  
536 participants actually rated 0.5M memories as more consistently recalled than 60 month old  
537 memories. Older memories were not impoverished in detail when compared to the detail available  
538 for recent memories. Moreover, an inspection of interview transcripts across experiments revealed  
539 participants rarely offered new details for previous memories when retested, countering the  
540 suggestion that increased detectability of old memories may arise from the insertion of new episodic  
541 or semantic details (69). The consistency in recalled detail across experiments could be attributable  
542 to participants recalling in Experiment 2 what they had said during Experiment 1. However whether  
543 or not participants remembered by proxy is irrelevant, as they still recalled the specific details of the  
544 original event, removing forgetting as a potential explanation of changes in neural patterns over  
545 time.

546

547 **The influence of repetition**

548 Retrieving a memory initiates reconsolidation, a transient state where memories are vulnerable to  
549 interference (70, 71). Therefore, repeated retrieval may cause this process to have an influence on  
550 neural representations. However, all memories were recalled one week before the fMRI scan, so if  
551 such an effect was present it would be matched across time-points. Retrieval at this stage may also  
552 accelerate consolidation (72), yet if this was a major influence, we would likely have found 0.5M  
553 memories to be more detectable than they were. Further repetition of memories within the scanner  
554 in Experiment 1 took place over a timescale that could not affect consolidation processes or  
555 interpretation of the initial neural data. Nevertheless, this could arguably affect vmPFC engagement  
556 over a longer period of time (73) and thus perturb the natural course of consolidation, influencing  
557 the results of Experiment 2. However, given that seven out of the eight specifically hypothesised  
558 temporally sensitive changes in neural representations were supported, an altered or accelerated

559 consolidation time-course appears highly unlikely. Again, recall recency was matched in Experiment  
560 2 by the memory interview, and recall frequency between experiments was low.

561 Taking a more general and parsimonious perspective, the ratings demonstrate that,  
562 naturally, all memories are recalled on an occasional basis (Table S1), therefore it seems highly  
563 unlikely that a mere six repetitions within a scanning session would significantly alter the time  
564 course of systems-level consolidation. It should also be noted that successful detection of neural  
565 patterns relied on the specific content of each memory, rather than being due to generic time-  
566 related retrieval processes (Fig S3). One alternative to the current two-experiment longitudinal  
567 design to limit repetition across experiments would be to have a different group of participants with  
568 different memories for the second experiment. However the strength of the current approach was  
569 the ability to track the transformation in neural patterns of the same memories over time.

570

#### 571 **The effect of selection**

572 An alternative interpretation of the time-sensitive vmPFC engagement is a systematic bias in the  
573 content of selected memories. For example, annual events coinciding across all participants, such as  
574 a seasonal holiday. However, recruitment took place over a period of five months in an evenly  
575 spaced manner, ensuring that such events did fall into the same temporal windows across  
576 participants. The occurrence of personal events such as birthdays was also random across  
577 participants. The use of personal photographs as memory cues also limited the reliance on time of  
578 year as a method for strategically retrieving memories. Furthermore, the nature of memory  
579 sampling was that unique, rather than generic, events were eligible, reducing the likelihood of  
580 events which were repeated annually being included. Memory detectability was high at 12 month  
581 intervals such as one, two and five years in this study, suggesting perhaps it is easier to recall events  
582 which have taken place at a similar time of year to the present. However this should have been  
583 reflected in behavioural ratings, and equivalently strong neural representations for recent  
584 memories, but neither was observed. Most importantly, if content rather than time-related

585 consolidation was the main influence on memory detectability, then we would not have observed  
586 any change in neural representation scores from Experiment 1 to Experiment 2, rather than the  
587 hypothesised shifts which emerged.

588         A related concern is that memories across time differ in nature because they differ in  
589 availability. Successful memory search is biased towards recency, meaning there are more events to  
590 choose from in the last few weeks, than remote time periods. Here, this confound is circumvented  
591 by design, given that search was equivalently constrained and facilitated at each time-point by the  
592 frequency at which participants took photographs, which was not assumed to change in a major way  
593 over time. These enduring “snap-shots” of memory, located within tight temporal windows (see  
594 Materials and methods) meant that memory selection was not confounded by retrieval difficulty or  
595 availability. It could also be argued that selection of time-points for this study should have been  
596 biased towards recency given that most forgetting occurs in the weeks and months after learning.  
597 However, it is important to dissociate systems-level consolidation from forgetting, as they are  
598 separate processes which are assumed to follow different time-courses. Memory forgetting follows  
599 an exponential decay (74), whereas systems-level consolidation has generally been assumed, until  
600 now, to be gradual and linear (75). Our study was concerned only with vivid, unique memories which  
601 were likely to persist through the systems-level consolidation process.

602

### 603 **Value**

604 Given that the medial prefrontal cortex is often associated with value and emotional processing (76),  
605 could these factors have influenced the current findings? Humans display a bias towards  
606 consolidating positive memories (77), and remembered information is more likely to be valued than  
607 that which is forgotten (78). Activity in vmPFC during autobiographical memory recall has been  
608 found to be modulated by both the personal significance and emotional content of memories (79).  
609 However, in the current two experiments, memories were matched across time periods on these  
610 variables, and the selection of memories through photographs taken on a day-to day basis also

611 mitigated against this effect. In the eight months between experiments, memories either remained  
612 unchanged or decreased slightly in their subjective ratings of significance and positivity, suggesting  
613 that these factors are an unlikely driving force behind the observed remote memory representations  
614 in vmPFC. For example, if recent memories in Experiment 1 were not well-represented in vmPFC  
615 because they were relatively insignificant, there is no reason to expect them to be more so eight  
616 months later, yet their neural representation strengthened over time nonetheless.

617

### 618 **Relation to previous findings**

619 A methodological discrepancy between this experiment and that conducted by Bonnici et al. (54), is  
620 the additional use of a photograph to assist in cueing memories. One possible interpretation of the  
621 neural representation scores is they represent a role for the vmPFC in the maintenance of visual  
622 working memory following cue offset. However, the prefrontal cortex is unlikely to contribute to  
623 maintenance of visual information (80). Furthermore, were this to be the driving effect behind  
624 neural representations here, the effect would be equivalent across time-periods, yet it is not.

625         There is, however, an obvious inconsistency between the findings of the current study and  
626 that of Bonnici, et al. (54). Unlike that study, we did not detect representations of 0.5M old  
627 memories in vmPFC. It could be that the support vector machine classification-based MVPA used by  
628 Bonnici et al. (54) is more sensitive to detection of memory representations than RSA, however, the  
629 current study was not optimised for such an analysis because it necessitated an increased ratio of  
630 conditions to trials. Nonetheless, the increase in memory representation scores from recent to  
631 remote memories was replicated and additionally refined in the current study with superior  
632 temporal precision. One observation which was consistent with the Bonnici findings was the  
633 detection of remote memories in the hippocampus, which also supports theories positing a  
634 perpetual role for this region in the vivid retrieval of autobiographical memories (10, 12). However,  
635 the weak detectability observed at more recent time points may reflect a limitation of the RSA

636 approach employed here to detect sparsely encoded hippocampal patterns, which may be overcome  
637 by a more targeted subfield analysis (81).

638 In the light of our hypotheses, Experiment 2 generated one anomalous finding. Twenty-four  
639 month old memories from Experiment 1 were no longer well represented eight months later. Why  
640 memories around 32M of age are not as reliant on vmPFC is unclear, but unlike other time-periods,  
641 we cannot verify this finding in the current experiment, as we did not sample 32M memories during  
642 Experiment 1.

643

#### 644 **Summary**

645 The current results revealed a two-stage process of autobiographical memory retrieval in the vmPFC  
646 over the course of systems-level consolidation, which was remarkably preserved across completely  
647 different sets of memories in one experiment, and closely replicated in a subsequent longitudinal  
648 experiment with the same participants and memories. These findings support the notion that the  
649 vmPFC becomes increasingly important over time for the retrieval of remote memories. Two  
650 particularly novel findings emerged. First, this process occurs relatively quickly, by four months  
651 following an experience. Second, vmPFC involvement after this time fluctuates in a highly consistent  
652 manner, depending on the precise age of the memory in question. Further work is clearly needed to  
653 explore the implications of these novel results. Overall, we conclude that our vmPFC findings may  
654 be explained by a dynamic interaction between the changing strength of a memory trace, the  
655 availability of temporally adjacent memories, and the concomitant differential strategies and  
656 schemas that are deployed to support the successful recollection of past experiences.

657

658

## 659 **Materials and methods**

### 660 **Ethics statement**

661 This study was approved by the local research ethics committee (University College London Research  
662 Ethics Committee, approval reference 6743/002). All investigations were conducted according to the  
663 principles expressed in the Declaration of Helsinki. Written informed consent was obtained for each  
664 participant.

665

### 666 **Experiment 1**

#### 667 ***Participants***

668 Thirty healthy, right handed participants (23 female) took part (mean age 25.3, SD 3.5, range 21-32).  
669 All had normal or corrected-to-normal vision.

670

#### 671 ***Memory interview and selection of autobiographical memories***

672 Participants were instructed to select at least three photographs from each of eight time-points in  
673 their past (0.5M, 4M, 8M, 12M, 16M, 20M, 24M and 60M relative to the time of taking part in the  
674 experiment) which reminded them of vivid, unique and specific autobiographical events. The  
675 sampling was retrospective, in that the photographs were chosen from the participants' pre-existing  
676 photograph collections and not prospectively taken with the study in mind. Highly personal,  
677 emotionally negative or repetitive events were deemed unsuitable. An additional requirement was  
678 that memories from the same time period should be dissimilar in content. For the four most recent  
679 time periods (0.5M-12M), the memories should have taken place within a temporal window two  
680 weeks either side of the specified date yielding a potential window of one month, for the next three  
681 time points (16M-24M), three weeks either side to allow a window of six weeks, and one month  
682 either side for the most remote time point (60M), giving a two month window. This graded approach  
683 was adopted to balance temporal precision with the availability of suitable memories at more  
684 remote time-points.



685 Participants were asked to describe in as much detail as possible the specific  
686 autobiographical memory elicited by a photograph. General probes were given by the interviewer  
687 where appropriate (e.g., “what else can you remember about this event?”). Participants were also  
688 asked to identify the most memorable part of the event which took place within a narrow temporal  
689 window and unfolded in an event-like way. They then created a short phrase pertaining to this  
690 episode, which was paired with the photograph to facilitate recall during the subsequent fMRI scan  
691 (Fig 1A). Participants were asked to rate each memory on a number of characteristics (see main text,  
692 Figs 1 and 6, Tables S1 and S3), and two memories from each time period which satisfied the criteria  
693 of high vividness and detail, and ease of recall were selected for recollection during the fMRI scan.

694

### 695 ***Behavioural analyses***

696 The interview was recorded and transcribed to facilitate an objective analysis of the details, and the  
697 widely-used Autobiographical Interview method was employed for scoring (56). Details provided for  
698 each memory were scored as either “internal” (specific events, temporal references, places,  
699 perceptual observations and thoughts or emotions) or “external” (unrelated events, semantic  
700 knowledge, repetition of details or other more general statements). To assess inter-rater reliability, a  
701 subset of sixteen memories (n=2 per time period) were randomly selected across 16 different  
702 subjects and scored by another experimenter blind to the aims and conditions of the study. Intra-  
703 class coefficient estimates were calculated using SPSS statistical package version 22 (SPSS Inc,  
704 Chicago, IL) based on a single measures, absolute-agreement, 2-way random-effects model.

705 As two memories per time period were selected for later recall in the scanner, behavioural  
706 ratings were averaged to produce one score per time period. Differences in subjective memory  
707 ratings across time periods were analysed using a one-way repeated measures ANOVA with  
708 Bonferroni-corrected paired t-tests. Differences in objective memory scores of internal and external  
709 details across time periods were analysed using a two-way repeated measures ANOVA with  
710 Bonferroni-corrected paired t-tests. A threshold of  $p < 0.05$  was used throughout both experiments.

711 All ANOVAs were subjected to Greenhouse-Geisser adjustment to the degrees of freedom if  
712 Mauchly's sphericity test identified that sphericity had been violated.

713

714 ***Task during fMRI scanning***

715 Participants returned approximately one week later (mean 6.9 days, SD 1) to recall the memories  
716 while undergoing an fMRI scan. Prior to the scan, participants were trained to recall each of the 16  
717 memories within a 12 second recall period [as in Bonnici et al. (54), Bonnici and Maguire (55)], when  
718 cued by the photograph alongside its associated cue phrase. There were two training trials per  
719 memory, and participants were asked to vividly and consistently recall a particular period of the  
720 original event which unfolded across a temporal window matching the recall period.

721         During scanning, participants recalled each memory six times (6 trials x 16 memories = 96  
722 trials). The two memories from each time period were never recalled together in the same session,  
723 nor was any one memory repeated within each session, resulting in 12 separate short sessions with  
724 eight trials in each, an approach recommended for optimal detection of condition-related activity  
725 patterns using MVPA (82). Trials were presented in a random order within each session. On each  
726 trial, the photograph and associated pre-selected cue phrase relating to each event were displayed  
727 on screen for three seconds. Following removal of this cue, participants then closed their eyes and  
728 recalled the memory. After 12 seconds, the black screen flashed white twice, to cue the participant  
729 to open their eyes. The participant was then asked to rate how vivid the memory recall had been  
730 using a five-key button box, on a scale of 1-5, where 1 was not vivid at all, and 5 was highly vivid.  
731 When the least vivid trials were excluded, the mean number of trials ( $/6$ ) selected for analysis from  
732 each time-point were as follows: 0.5M: 5.65 (SD 0.57), 4M: 5.50 (SD 0.56), 8M: 5.43 (SD 0.55), 12M:  
733 5.50 (SD 0.63), 16M: 5.50 (SD 0.59), 20M: 5.43 (SD 0.65), 24M: 5.42 (SD 0.56), 60M: 5.23 (SD 0.69).

734

735

736

737 ***MRI data acquisition***

738 Structural and functional data were acquired using a 3T MRI system (Magnetom TIM Trio, Siemens  
739 Healthcare, Erlangen, Germany). Both types of scan were performed within a partial volume which  
740 incorporated the entire extent of the ventromedial prefrontal cortex (Fig 3A).

741 Structural images were collected using a single-slab 3D T2-weighted turbo spin echo  
742 sequence with variable flip angles (SPACE) (83) in combination with parallel imaging, to  
743 simultaneously achieve a high image resolution of  $\sim 500 \mu\text{m}$ , high sampling efficiency and short scan  
744 time while maintaining a sufficient signal-to-noise ratio (SNR). After excitation of a single axial slab  
745 the image was read out with the following parameters: resolution =  $0.52 \times 0.52 \times 0.5 \text{ mm}$ , matrix =  
746  $384 \times 328$ , partitions = 104, partition thickness =  $0.5 \text{ mm}$ , partition oversampling = 15.4%, field of  
747 view =  $200 \times 171 \text{ mm}^2$ , TE = 353 ms, TR = 3200 ms, GRAPPA x 2 in phase-encoding (PE) direction,  
748 bandwidth = 434 Hz/pixel, echo spacing = 4.98 ms, turbo factor in PE direction = 177, echo train  
749 duration = 881, averages = 1.9. For reduction of signal bias due to, for example, spatial variation in  
750 coil sensitivity profiles, the images were normalized using a prescan, and a weak intensity filter was  
751 applied as implemented by the scanner's manufacturer. To improve the SNR of the anatomical  
752 image, three scans were acquired for each participant, coregistered and averaged. Additionally, a  
753 whole brain 3D FLASH structural scan was acquired with a resolution of  $1 \times 1 \times 1 \text{ mm}$ .

754 Functional data were acquired using a 3D echo planar imaging (EPI) sequence which has  
755 been demonstrated to yield improved BOLD sensitivity compared to 2D EPI acquisitions (84). Image  
756 resolution was  $1.5\text{mm}^3$  and the field-of-view was 192mm in-plane. Forty slices were acquired with  
757 20% oversampling to avoid wrap-around artefacts due to imperfect slab excitation profile. The echo  
758 time (TE) was 37.30 ms and the volume repetition time (TR) was 3.65s. Parallel imaging with GRAPPA  
759 image reconstruction (85) acceleration factor 2 along the phase-encoding direction was used to  
760 minimize image distortions and yield optimal BOLD sensitivity. The dummy volumes necessary to  
761 reach steady state and the GRAPPA reconstruction kernel were acquired prior to the acquisition of  
762 the image data as described in Lutti et al. (84). Correction of the distortions in the EPI images was

763 implemented using B0-field maps obtained from double-echo FLASH acquisitions (matrix size 64x64;  
764 64 slices; spatial resolution 3mm<sup>3</sup>; short TE=10 ms; long TE=12.46 ms; TR=1020 ms) and processed  
765 using the FieldMap toolbox available in SPM (86).

766

### 767 ***MRI data preprocessing***

768 fMRI data were analysed using SPM12 ([www.fil.ion.ucl.ac.uk/spm](http://www.fil.ion.ucl.ac.uk/spm)). All images were first bias  
769 corrected to compensate for image inhomogeneity associated with the 32 channel head coil (87).  
770 Fieldmaps collected during the scan were used to generate voxel displacement maps. EPIs for each  
771 of the twelve sessions were then realigned to the first image and unwrapped using the voxel  
772 displacement maps calculated above. The three high-resolution structural images were averaged to  
773 reduce noise, and co-registered to the whole brain structural scan. EPIs were also co-registered to  
774 the whole brain structural scan. Manual segmentation of the vmPFC was performed using ITK-SNAP  
775 on the group averaged structural scan normalised to MNI space. The normalised group mask was  
776 warped back into each participant's native space using the inverse deformation field generated by  
777 individual participant structural scan segmentations. The overlapping voxels between this  
778 participant-specific vmPFC mask and the grey matter mask generated by the structural scan  
779 segmentation were used to create a native-space grey matter vmPFC mask for each individual  
780 participant.

781

### 782 ***Representational Similarity Analysis***

783 Functional data were analysed at the single subject level without warping or smoothing. Each recall  
784 trial was modelled as a separate GLM, which comprised the 12 second period from the offset of the  
785 memory cue to just before the white flash which indicated to the participant they should open their  
786 eyes. Motion parameters were included as regressors of no interest. RSA (88), was performed using  
787 the RSA toolbox (<http://www.mrc-cbu.cam.ac.uk/methods-and-resources/toolboxes/>) and custom  
788 MATLAB (version R2014a) scripts. In order to account for the varying levels of noise across voxels

789 which can affect the results of multivariate fMRI analyses, multivariate noise normalisation (89) was  
790 performed on the estimated pattern of neural activity separately for each trial. This approach  
791 normalises the estimated beta weight of each voxel using the residuals of the first-level GLM and the  
792 covariance structure of this noise. This results in the down-weighting of noisier voxels and a more  
793 accurate estimate of the task-related activity of each voxel.

794 The average number of voxels analysed in the vmPFC across the two sets of memories was  
795 5252 (SD 1227). Whole ROI-based analysis was preferred to a searchlight approach which would  
796 involve comparing neural with model similarity matrices (90), as we did not have strong *a priori*  
797 hypothesis about changes in neural representations over time against which to test the neural data,  
798 nor did we want to make assumptions regarding the spatial distribution of informative voxels in the  
799 vmPFC.

800 As participants recalled two memories per time-point, the dataset was first split into two  
801 sets of eight time points, which were analysed separately using RSA. To characterise the strength of  
802 memory representations in the vmPFC, the similarity of neural patterns across recall trials of the  
803 same memory was first calculated using the Pearson product-moment correlation coefficient,  
804 resulting in a “within-memory” similarity score. Then the neural patterns of each memory were  
805 correlated with those of all other memories, yielding a “between-memory” similarity score. Both  
806 within- and between-memory correlations were performed on trials from separate runs. For each  
807 memory, the between-memory score was then subtracted from the within-memory score to provide  
808 a neural representation score (Fig 3C). This score was then averaged across the two memories at  
809 each time-point. Results for the left and the right hemispheres were highly similar, and therefore the  
810 data we report here are from the vmPFC bilaterally. A distinctive neural pattern associated with the  
811 recall of memories at each time period would yield a score significantly higher than zero, which was  
812 assessed using a one-sample t-test. Strengthening or weakening of memory representations as a  
813 function of remoteness would result in a significant difference in memory representation scores  
814 across time periods, and this was assessed using a one-way repeated measures ANOVA with post-

815 hoc two-tailed paired t-tests. Error bars on graphs displaying neural representation scores were  
816 normalised to reflect within- rather than between-subject variability in absolute values, using the  
817 method recommended by Cousineau (91) for within-subjects designs. The range of values that we  
818 observed are entirely consistent with those in other studies employing a similar RSA approach in a  
819 variety of learning, memory and navigation tasks in a wide range of brain regions (92-101).

820

### 821 ***Searchlight analysis***

822 An RSA searchlight analysis was conducted in normalised space, on multivariate noise-normalised  
823 data within the ROI. This approach selected every voxel within the ROI, and using a volumetric  
824 approach which is constrained by the shape of the ROI, expanded the area around that voxel until an  
825 area of 160 voxels was reached. Within each of these spheres, memories were correlated with  
826 themselves, and other memories, analogous to the standard ROI approach. Then the resulting neural  
827 RSM was correlated using Spearman's rank correlation coefficient with a model RSM which  
828 consisted of ones along the diagonal and zeros on the off-diagonal. This model RSM was used to  
829 detect if individual memories were detectable across all time-points. For every voxel, the average  
830 correlation from every sphere it participated in was calculated, to generate a more representative  
831 score of its informational content. Parametric assumptions regarding the spatial distribution of  
832 unsmoothed data may not hold. Therefore we used statistical nonparametric mapping (SnPM13) on  
833 the resulting searchlight images. We used 10,000 random permutations, a cluster-based significance  
834 threshold of  $t=3$ , and a family-wise-error corrected threshold of  $p<0.05$  within the ROI.

835

## 836 **Experiment 2**

### 837 ***Participants***

838 Sixteen of the 30 participants who took part in Experiment 1 returned to take part in Experiment 2  
839 (14 female, mean age 24.7, SD 3.1, range 21-33) approximately eight months later (8.4 months, SD  
840 1.2).

841

842 ***Memory interview***

843 Participants were presented with the 16 photographs and cue phrases associated with the  
844 autobiographical memories in Experiment 1 and were asked to describe in as much detail as possible  
845 the specific event which they had recalled previously. General probes were given by the interviewer  
846 where appropriate (e.g. “what else can you remember about this event?”). The interviewer availed  
847 of summarised transcripts from Experiment 1 to verify the same memory and details were being  
848 recalled. Participants then rated each memory on the same characteristics assessed in Experiment 1.  
849 The memory interview during Experiment 2 was also recorded and transcribed.

850

851 ***Behavioural analyses***

852 The analysis of subjective and objective ratings for Experiment 2 followed exactly the same  
853 procedure as Experiment 1. The extent to which subjective ratings for the same memory had  
854 changed between Experiment 1 and Experiment 2 was assessed using a two-way (experiment x time  
855 period) repeated measures ANOVA with Bonferroni-corrected paired t-tests. Differences in objective  
856 memory ratings across experiments were analysed using a two (experiment) x two (detail) x eight  
857 (time period) repeated measures ANOVA with Bonferroni-corrected paired t-tests.

858

859 ***Task during fMRI scanning***

860 Participants returned approximately one week later for the fMRI scan (mean 5.5 days, SD 3.7). Prior  
861 to scanning, only one reminder training trial per memory was deemed necessary given the prior  
862 experience of performing the task in Experiment 1. The scanning task remained unchanged from  
863 Experiment 1, aside from the re-randomisation of trials within each session. When the least vivid  
864 trials were excluded, the mean number of trials (/6) selected for analysis from each time period  
865 were as follows: 8M: 5.94 (SD 0.25), 12M: 5.97 (SD 0.13), 16M: 5.88 (SD 0.29), 20M: 5.88 (SD 0.29),  
866 24M: 5.94 (SD 0.25), 28M: 5.94 (SD 0.17), 32M: 5.84 (SD 0.40), 68M: 5.81 (SD 0.36).

867

868 ***MRI data acquisition***

869 Structural and functional data were acquired using the same scanner and scanning sequences as  
870 Experiment 1. However the prior acquisition of the partial volume structural MRI scans negated the  
871 need to include these in the protocol of Experiment 2.

872

873 ***MRI data preprocessing***

874 fMRI data were preprocessed using the same pipeline as Experiment 1, with the additional step of  
875 co-registering the functional scans of Experiment 2 to the structural scans of Experiment 1, which  
876 enabled the use of the vmPFC masks from Experiment 1. First-level GLMs of each recall trial were  
877 constructed in an identical manner to Experiment 1.

878

879 ***Representational Similarity Analysis***

880 RSA of the Experiment 2 fMRI data was conducted in an identical manner to Experiment 1. The  
881 average number of voxels analysed in the vmPFC across the two sets of memories for all participants  
882 was 5228 (SD 1765). To generate predicted changes in representations in the eight months from  
883 Experiment 1 to Experiment 2, the scores from Experiment 1 were shifted by two time-points, and a  
884 two-tailed paired t-test was performed on each memory's original neural representation score and  
885 its expected score eight months later (Fig 5). To ascertain whether the observed neural  
886 representation scores had changed between Experiments 1 and 2, a two-way (experiment x time  
887 period) repeated measures ANOVA was performed. To investigate if these changes mirrored the  
888 predictions generated by the original data, paired t-tests were performed between the actual neural  
889 representation scores for each memory from Experiment 1 and Experiment 2, one-tailed if there was  
890 a hypothesised increase or decrease.

891

892

893



894 **Funding**

895 E.A.M. and D.N.B are supported by a Principal Research Fellowship from Wellcome to E.A.M  
896 (101759/Z/13/Z). The Wellcome Centre for Human Neuroimaging is supported by a Centre Award  
897 from Wellcome (203147/Z/16/Z).

898

899 **Author Contributions**

900 D.N.B. and E.A.M designed the experiment, with input from M.J.C. D.N.B. conducted the  
901 experiment. D.N.B. analysed the data with input from E.A.M. and M.J.C. D.N.B. and E.A.M. wrote  
902 the paper, with input from M.J.C.

903

904 **Acknowledgements**

905 We thank David Bradbury and the Imaging Support team for technical assistance.

906

907

908

909

## 910 References

911

- 912 1. Kandel ER. The molecular biology of memory storage: a dialogue between genes and  
913 synapses. *Science*. 2001;294(5544):1030-8.
- 914 2. Pastalkova E, Serrano P, Pinkhasova D, Wallace E, Fenton AA, Sacktor TC. Storage of spatial  
915 information by the maintenance mechanism of LTP. *Science*. 2006;313(5790):1141-4.
- 916 3. Runyan JD, Dash PK. Inhibition of hippocampal protein synthesis following recall disrupts  
917 expression of episodic-like memory in trace conditioning. *Hippocampus*. 2005;15(3):333-9.
- 918 4. Guzowski JF. Insights into immediate-early gene function in hippocampal memory  
919 consolidation using antisense oligonucleotide and fluorescent imaging approaches. *Hippocampus*.  
920 2002;12(1):86-104.
- 921 5. Morris RG, Moser EI, Riedel G, Martin SJ, Sandin J, Day M, et al. Elements of a  
922 neurobiological theory of the hippocampus: the role of activity-dependent synaptic plasticity in  
923 memory. *Phil Trans R Soc Lond B, Biol Sci*. 2003;358(1432):773-86.
- 924 6. Frankland PW, Bontempi B. The organization of recent and remote memories. *Nature Rev*  
925 *Neurosci*. 2005;6(2):119-30.
- 926 7. Squire LR, Genzel L, Wixted JT, Morris RG. Memory consolidation. *Cold Spring Harbor*  
927 *Perspectives in Biology*. 2015;7(8):a021766.
- 928 8. Moscovitch M, Rosenbaum RS, Gilboa A, Addis DR, Westmacott R, Grady C, et al. Functional  
929 neuroanatomy of remote episodic, semantic and spatial memory: a unified account based on  
930 multiple trace theory. *J Anat*. 2005;207(1):35-66.
- 931 9. Winocur G, Moscovitch M. Memory transformation and systems consolidation. *JINS*.  
932 2011;17(5):766-80.
- 933 10. Moscovitch M, Cabeza R, Winocur G, Nadel L. Episodic memory and beyond: The  
934 hippocampus and neocortex in transformation. *Ann Rev Psychol*. 2016;67:105-34.
- 935 11. Maguire EA. Memory consolidation in humans: new evidence and opportunities. *Exp Physiol*.  
936 2014;99(3):471-86.
- 937 12. Maguire EA, Mullally SL. The hippocampus: a manifesto for change. *J Exp Psych: Gen*.  
938 2013;142(4):1180-9.
- 939 13. Zhao MG, Toyoda H, Lee YS, Wu LJ, Ko SW, Zhang XH, et al. Roles of NMDA NR2B subtype  
940 receptor in prefrontal long-term potentiation and contextual fear memory. *Neuron*. 2005;47(6):859-  
941 72.
- 942 14. Lesburgueres E, Gobbo OL, Alaux-Cantin S, Hambucken A, Trifilieff P, Bontempi B. Early  
943 tagging of cortical networks is required for the formation of enduring associative memory. *Science*.  
944 2011;331(6019):924-8.
- 945 15. Leon WC, Bruno MA, Allard S, Nader K, Cuello AC. Engagement of the PFC in consolidation  
946 and recall of recent spatial memory. *Learn Mem*. 2010;17(6):297-305.
- 947 16. Einarsson EO, Nader K. Involvement of the anterior cingulate cortex in formation,  
948 consolidation, and reconsolidation of recent and remote contextual fear memory. *Learn Mem*.  
949 2012;19(10):449-52.
- 950 17. Tse D, Takeuchi T, Takekuma M, Kajii Y, Okuno H, Tohyama C, et al. Schema-dependent gene  
951 activation and memory encoding in neocortex. *Science*. 2011;333(6044):891-5.
- 952 18. Maviel T, Durkin TP, Menzaghi F, Bontempi B. Sites of neocortical reorganization critical for  
953 remote spatial memory. *Science*. 2004;305(5680):96-9.
- 954 19. Teixeira CM, Pomedli SR, Maei HR, Kee N, Frankland PW. Involvement of the anterior  
955 cingulate cortex in the expression of remote spatial memory. *J Neurosci*. 2006;26(29):7555-64.
- 956 20. Lopez J, Herbeaux K, Cosquer B, Engeln M, Muller C, Lazarus C, et al. Context-dependent  
957 modulation of hippocampal and cortical recruitment during remote spatial memory retrieval.  
958 *Hippocampus*. 2012;22(4):827-41.
- 959 21. Frankland PW, Bontempi B, Talton LE, Kaczmarek L, Silva AJ. The involvement of the anterior  
960 cingulate cortex in remote contextual fear memory. *Science*. 2004;304(5672):881-3.

- 961 22. Luo F, Zheng J, Sun X, Deng WK, Li BM, Liu F. Prelimbic cortex extracellular signal-regulated  
962 kinase 1/2 activation is required for memory retrieval of long-term inhibitory avoidance. *Brain Res.*  
963 2017;1661:88-99.
- 964 23. Liu F, Zheng XL, Li BM. The anterior cingulate cortex is involved in retrieval of long-  
965 term/long-lasting but not short-term memory for step-through inhibitory avoidance in rats. *Neurosci*  
966 *Lett.* 2009;460(2):175-9.
- 967 24. Ding HK, Teixeira CM, Frankland PW. Inactivation of the anterior cingulate cortex blocks  
968 expression of remote, but not recent, conditioned taste aversion memory. *Learn Mem.*  
969 2008;15(5):290-3.
- 970 25. Takehara K, Kawahara S, Kirino Y. Time-dependent reorganization of the brain components  
971 underlying memory retention in trace eyeblink conditioning. *J Neurosci.* 2003;23(30):9897-905.
- 972 26. Kitamura T, Ogawa SK, Roy DS, Okuyama T, Morrissey MD, Smith LM, et al. Engrams and  
973 circuits crucial for systems consolidation of a memory. *Science.* 2017;356(6333):73-8.
- 974 27. Takehara-Nishiuchi K, Nakao K, Kawahara S, Matsuki N, Kirino Y. Systems consolidation  
975 requires postlearning activation of NMDA receptors in the medial prefrontal cortex in trace eyeblink  
976 conditioning. *J Neurosci.* 2006;26(19):5049-58.
- 977 28. Restivo L, Vetere G, Bontempi B, Ammassari-Teule M. The formation of recent and remote  
978 memory is associated with time-dependent formation of dendritic spines in the hippocampus and  
979 anterior cingulate cortex. *J Neurosci.* 2009;29(25):8206-14.
- 980 29. Vetere G, Restivo L, Cole CJ, Ross PJ, Ammassari-Teule M, Josselyn SA, et al. Spine growth in  
981 the anterior cingulate cortex is necessary for the consolidation of contextual fear memory. *Proc Natl*  
982 *Acad Sci USA.* 2011;108(20):8456-60.
- 983 30. Bero AW, Meng J, Cho S, Shen AH, Canter RG, Ericsson M, et al. Early remodeling of the  
984 neocortex upon episodic memory encoding. *Proc Natl Acad Sci USA.* 2014;111(32):11852-7.
- 985 31. Nieuwenhuis IL, Takashima A. The role of the ventromedial prefrontal cortex in memory  
986 consolidation. *Behavioural Brain Res.* 2011;218(2):325-34.
- 987 32. Bertossi E, Tesini C, Cappelli A, Ciaramelli E. Ventromedial prefrontal damage causes a  
988 pervasive impairment of episodic memory and future thinking. *Neuropsychologia.* 2016;90:12-24.
- 989 33. McCormick C, Ciaramelli E, De Luca F, Maguire EA. Comparing and contrasting the cognitive  
990 effects of hippocampal and ventromedial prefrontal cortex damage: A review of human lesion  
991 studies. *Neuroscience.* 2017.
- 992 34. Turner MS, Cipelotti L, Yousry TA, Shallice T. Confabulation: damage to a specific inferior  
993 medial prefrontal system. *Cortex.* 2008;44(6):637-48.
- 994 35. Takashima A, Petersson KM, Rutters F, Tendolkar I, Jensen O, Zwarts MJ, et al. Declarative  
995 memory consolidation in humans: a prospective functional magnetic resonance imaging study. *Proc*  
996 *Natl Acad Sci USA.* 2006;103(3):756-61.
- 997 36. Takashima A, Nieuwenhuis IL, Jensen O, Talamini LM, Rijpkema M, Fernandez G. Shift from  
998 hippocampal to neocortical centered retrieval network with consolidation. *J Neurosci.*  
999 2009;29(32):10087-93.
- 1000 37. Watanabe T, Kimura HM, Hirose S, Wada H, Imai Y, Machida T, et al. Functional dissociation  
1001 between anterior and posterior temporal cortical regions during retrieval of remote memory. *J*  
1002 *Neurosci.* 2012;32(28):9659-70.
- 1003 38. Harand C, Bertran F, La Joie R, Landeau B, Mezenge F, Desgranges B, et al. The hippocampus  
1004 remains activated over the long term for the retrieval of truly episodic memories. *PloS One.*  
1005 2012;7(8):e43495.
- 1006 39. Furman O, Mendelsohn A, Dudai Y. The episodic engram transformed: Time reduces  
1007 retrieval-related brain activity but correlates it with memory accuracy. *Learn Mem.* 2012;19(12):575-  
1008 87.
- 1009 40. Svoboda E, McKinnon MC, Levine B. The functional neuroanatomy of autobiographical  
1010 memory: a meta-analysis. *Neuropsychologia.* 2006;44(12):2189-208.

- 1011 41. Niki K, Luo J. An fMRI study on the time-limited role of the medial temporal lobe in long-  
1012 term topographical autobiographical memory. *J Cogn Neurosci*. 2002;14(3):500-7.
- 1013 42. Oddo S, Lux S, Weiss PH, Schwab A, Welzer H, Markowitsch HJ, et al. Specific role of medial  
1014 prefrontal cortex in retrieving recent autobiographical memories: an fMRI study of young female  
1015 subjects. *Cortex*. 2010;46(1):29-39.
- 1016 43. Piolino P, Giffard-Quillon G, Desgranges B, Chetelat G, Baron JC, Eustache F. Re-experiencing  
1017 old memories via hippocampus: a PET study of autobiographical memory. *NeuroImage*.  
1018 2004;22(3):1371-83.
- 1019 44. Maguire EA, Henson RN, Mummery CJ, Frith CD. Activity in prefrontal cortex, not  
1020 hippocampus, varies parametrically with the increasing remoteness of memories. *Neuroreport*.  
1021 2001;12(3):441-4.
- 1022 45. Maguire EA, Frith CD. Lateral asymmetry in the hippocampal response to the remoteness of  
1023 autobiographical memories. *J Neurosci*. 2003;23(12):5302-7.
- 1024 46. Piefke M, Weiss PH, Markowitsch HJ, Fink GR. Gender differences in the functional  
1025 neuroanatomy of emotional episodic autobiographical memory. *Hum Brain Mapp*. 2005;24(4):313-  
1026 24.
- 1027 47. Ryan L, Nadel L, Keil K, Putnam K, Schnyer D, Trouard T, et al. Hippocampal complex and  
1028 retrieval of recent and very remote autobiographical memories: evidence from functional magnetic  
1029 resonance imaging in neurologically intact people. *Hippocampus*. 2001;11(6):707-14.
- 1030 48. Gilboa A, Winocur G, Grady CL, Hevenor SJ, Moscovitch M. Remembering our past:  
1031 functional neuroanatomy of recollection of recent and very remote personal events. *Cereb Cortex*.  
1032 2004;14(11):1214-25.
- 1033 49. Rekkas PV, Constable RT. Evidence that autobiographic memory retrieval does not become  
1034 independent of the hippocampus: an fMRI study contrasting very recent with remote events. *J Cogn*  
1035 *Neurosci*. 2005;17(12):1950-61.
- 1036 50. Steinvorth S, Corkin S, Halgren E. Ecphory of autobiographical memories: an fMRI study of  
1037 recent and remote memory retrieval. *NeuroImage*. 2006;30(1):285-98.
- 1038 51. Soderlund H, Moscovitch M, Kumar N, Mandic M, Levine B. As time goes by: hippocampal  
1039 connectivity changes with remoteness of autobiographical memory retrieval. *Hippocampus*.  
1040 2012;22(4):670-9.
- 1041 52. Tsukiura T, Fujii T, Okuda J, Ohtake H, Kawashima R, Itoh M, et al. Time-dependent  
1042 contribution of the hippocampal complex when remembering the past: a PET study. *Neuroreport*.  
1043 2002;13(17):2319-23.
- 1044 53. Chadwick MJ, Bonnici HM, Maguire EA. Decoding information in the human hippocampus: a  
1045 user's guide. *Neuropsychologia*. 2012;50(13):3107-21.
- 1046 54. Bonnici HM, Chadwick MJ, Lutti A, Hassabis D, Weiskopf N, Maguire EA. Detecting  
1047 representations of recent and remote autobiographical memories in vmPFC and hippocampus. *J*  
1048 *Neurosci*. 2012;32(47):16982-91.
- 1049 55. Bonnici HM, Maguire EA. Two years later - Revisiting autobiographical memory  
1050 representations in vmPFC and hippocampus. *Neuropsychologia*. 2017 (Forthcoming: doi:  
1051 10.1016/j.neuropsychologia.2017.05.014).
- 1052 56. Levine B, Svoboda E, Hay JF, Winocur G, Moscovitch M. Aging and autobiographical memory:  
1053 Dissociating episodic from semantic retrieval. *Psychol Aging*. 2002;17(4):677-89.
- 1054 57. Mackey S, Petrides M. Architecture and morphology of the human ventromedial prefrontal  
1055 cortex. *Eur J Neurosci*. 2014;40(5):2777-96.
- 1056 58. Holland AC, Addis DR, Kensinger EA. The neural correlates of specific versus general  
1057 autobiographical memory construction and elaboration. *Neuropsychologia*. 2011;49(12):3164-77.
- 1058 59. Sheldon S, Levine B. Same as it ever was: vividness modulates the similarities and differences  
1059 between the neural networks that support retrieving remote and recent autobiographical memories.  
1060 *NeuroImage*. 2013;83:880-91.

- 1061 60. Teyler TJ, DiScenna P. The role of hippocampus in memory: a hypothesis. *Neurosci Biobehav*  
1062 *Rev.* 1985;9(3):377-89.
- 1063 61. Squire LR, Alvarez P. Retrograde amnesia and memory consolidation: a neurobiological  
1064 perspective. *Curr Opin Neurobiol.* 1995;5(2):169-77.
- 1065 62. Nadel L, Winocur G, Ryan L, Moscovitch M. Systems consolidation and hippocampus: two  
1066 views. *Debates in Neuroscience.* 2007;1(2-4):55-66.
- 1067 63. Dudai Y. The restless engram: consolidations never end. *Ann Rev Neurosci.* 2012;35:227-47.
- 1068 64. Crovitz HF, Schiffman H. Frequency of episodic memories as a function of their age. *Bull*  
1069 *Psychonomic Soc.* 1974;4:517-8.
- 1070 65. Eichenbaum H. Memory: organization and control. *Ann Rev Psychol.* 2017;68:19-45.
- 1071 66. Schnider A, von Daniken C, Gutbrod K. Disorientation in amnesia. A confusion of memory  
1072 traces. *Brain.* 1996;119 ( Pt 5):1627-32.
- 1073 67. Hebscher M, Gilboa A. A boost of confidence: The role of the ventromedial prefrontal cortex  
1074 in memory, decision-making, and schemas. *Neuropsychologia.* 2016;90:46-58.
- 1075 68. Rubin RD, Schwarb H, Lucas HD, Dulas MR, Cohen NJ. Dynamic hippocampal and prefrontal  
1076 contributions to memory processes and representations blur the boundaries of traditional cognitive  
1077 domains. *Brain Sci.* 2017;7(7):82.
- 1078 69. Berkers RM, van Kesteren MT. Autobiographical memory transformation across  
1079 consolidation. *J Neurosci.* 2013;33(13):5435-6.
- 1080 70. Nader K. Reconsolidation and the dynamic nature of memory. *Cold Spring Harbor*  
1081 *Perspectives in Biology.* 2015;7(10):a021782.
- 1082 71. Schwabe L, Wolf OT. New episodic learning interferes with the reconsolidation of  
1083 autobiographical memories. *PloS One.* 2009;4(10):e7519.
- 1084 72. Antony JW, Ferreira CS, Norman KA, Wimber M. Retrieval as a fast route to memory  
1085 consolidation. *Trends Cogn Sci.* 2017;21(8):573-6.
- 1086 73. Nadel L, Campbell J, Ryan L. Autobiographical memory retrieval and hippocampal activation  
1087 as a function of repetition and the passage of time. *Neural Plasticity.* 2007;2007:90472.
- 1088 74. Averell L, Heathcote A. The form of the forgetting curve and the fate of memories. *J Math*  
1089 *Psychol.* 2011; 55(1):25-35.
- 1090 75. McClelland JL, McNaughton BL, O'Reilly RC. Why there are complementary learning systems  
1091 in the hippocampus and neocortex: Insights from the successes and failures of connectionist models  
1092 of learning and memory. *Psychol Rev.* 1995;102(3):419-57.
- 1093 76. Grabenhorst F, Rolls ET. Value, pleasure and choice in the ventral prefrontal cortex. *Trends*  
1094 *Cogn Sci.* 2011;15(2):56-67.
- 1095 77. Anderson MC, Hanslmayr S. Neural mechanisms of motivated forgetting. *Trends in Cogn Sci.*  
1096 2014;18(6):279-92.
- 1097 78. Rhodes MG, Witherby AE, Castel AD, Murayama K. Explaining the forgetting bias effect on  
1098 value judgments: The influence of memory for a past test. *Mem Cogn.* 2017;45(3):362-74.
- 1099 79. Lin WJ, Horner AJ, Burgess N. Ventromedial prefrontal cortex, adding value to  
1100 autobiographical memories. *Scientific Rep.* 2016;6:28630.
- 1101 80. Lee SH, Kravitz DJ, Baker CI. Goal-dependent dissociation of visual and prefrontal cortices  
1102 during working memory. *Nat Neurosci.* 2013;16(8):997-9.
- 1103 81. Bonnici HM, Chadwick MJ, Maguire EA. Representations of recent and remote  
1104 autobiographical memories in hippocampal subfields. *Hippocampus.* 2013;23(10):849-54.
- 1105 82. Coutanche MN, Thompson-Schill SL. The advantage of brief fMRI acquisition runs for multi-  
1106 voxel pattern detection across runs. *NeuroImage.* 2012;61(4):1113-9.
- 1107 83. Mugler JP, 3rd, Bao S, Mulkern RV, Guttman CR, Robertson RL, Jolesz FA, et al. Optimized  
1108 single-slab three-dimensional spin-echo MR imaging of the brain. *Radiology.* 2000;216(3):891-9.
- 1109 84. Lutti A, Thomas DL, Hutton C, Weiskopf N. High-resolution functional MRI at 3 T: 3D/2D  
1110 echo-planar imaging with optimized physiological noise correction. *Magn Reson Med.*  
1111 2013;69(6):1657-64.

- 1112 85. Griswold MA, Jakob PM, Heidemann RM, Nittka M, Jellus V, Wang J, et al. Generalized  
1113 autocalibrating partially parallel acquisitions (GRAPPA). *Magn Reson Med*. 2002;47(6):1202-10.
- 1114 86. Hutton C, Bork A, Josephs O, Deichmann R, Ashburner J, Turner R. Image distortion  
1115 correction in fMRI: A quantitative evaluation. *NeuroImage*. 2002;16(1):217-40.
- 1116 87. Van Leemput K, Maes F, Vandermeulen D, Suetens P. Automated model-based tissue  
1117 classification of MR images of the brain. *IEEE Transactions on Medical Imaging*. 1999;18(10):897-908.
- 1118 88. Kriegeskorte N, Kievit RA. Representational geometry: integrating cognition, computation,  
1119 and the brain. *Trends Cogn Sci*. 2013;17(8):401-12.
- 1120 89. Walther A, Nili H, Ejaz N, Alink A, Kriegeskorte N, Diedrichsen J. Reliability of dissimilarity  
1121 measures for multi-voxel pattern analysis. *NeuroImage*. 2016;137:188-200.
- 1122 90. Kriegeskorte N, Goebel R, Bandettini P. Information-based functional brain mapping. *Proc*  
1123 *Natl Acad Sci USA*. 2006;103(10):3863-8.
- 1124 91. Cousineau D. Confidence intervals in within-subject designs: A simpler solution to Loftus and  
1125 Masson's method. *Tutorials in Quantitative Methods for Psychology*. 2005;1(1):42-5.
- 1126 92. Chadwick MJ, Jolly AEJ, Amos DP, Hassabis D, Spiers HJ. A goal direction signal in the human  
1127 entorhinal/subicular region. *Curr Biol*. 2015;25(1):87-92.
- 1128 93. Hsieh L-T, Gruber MJ, Jenkins LJ, Ranganath C. Hippocampal activity patterns carry  
1129 information about objects in temporal context. *Neuron*. 2014;81(5):1165-78.
- 1130 94. Schapiro AC, Turk-Browne NB, Norman KA, Botvinick MM. Statistical learning of temporal  
1131 community structure in the hippocampus. *Hippocampus*. 2016;26(1):3-8.
- 1132 95. Schuck Nicolas W, Cai Ming B, Wilson Robert C, Niv Y. Human orbitofrontal cortex represents  
1133 a cognitive map of state space. *Neuron*. 2016;91(6):1402-12.
- 1134 96. Kim M, Jeffery KJ, Maguire EA. Multivoxel pattern analysis reveals 3D place information in  
1135 the human hippocampus. *J Neurosci*. 2017;37(16):4270-4279.
- 1136 97. Hsieh L-T, Ranganath C. Cortical and subcortical contributions to sequence retrieval:  
1137 Schematic coding of temporal context in the neocortical recollection network. *NeuroImage*.  
1138 2015;121:78-90.
- 1139 98. Deuker L, Bellmund JLS, Navarro Schröder T, Doeller CF. An event map of memory space in  
1140 the hippocampus. *ELife*. 2016;5:e16534.
- 1141 99. Bellmund JLS, Deuker L, Navarro Schröder T, Doeller CF. Grid-cell representations in mental  
1142 simulation. *ELife*. 2016;5:e17089.
- 1143 100. Milivojevic B, Vicente-Grabovetsky A, Doeller CF. Insight reconfigures hippocampal-  
1144 prefrontal memories. *Curr Biol*. 2015;25(7):821-30.
- 1145 101. Staresina BP, Henson RNA, Kriegeskorte N, Alink A. Episodic reinstatement in the medial  
1146 temporal lobe. *J Neurosci*. 2012;32(50):18150-6.
- 1147  
1148
